29 **Abstract**

30 The F-box and chemosensory GPCR (csGPCR) gene families are greatly expanded in nematodes,  
31 including the model organism *Caenorhabditis elegans*, compared to insects and vertebrates.  
32 However, the intraspecific evolution of these two gene families in nematodes remain unexamined.  
33 In this study, we analyzed the genomic sequences of 330 recently sequenced wild isolates of *C.*  
34 *elegans* using a range of population genetics approaches. We found that F-box and csGPCR genes,  
35 especially the *Srw* family csGPCRs, showed much more diversity than other gene families.  
36 Population structure analysis and phylogenetic analysis divided the wild strains into eight non-  
37 Hawaiian and three Hawaiian subpopulations. Some Hawaiian strains appeared to be more  
38 ancestral than all other strains. F-box and csGPCR genes maintained a great amount of the  
39 ancestral variants in the Hawaiian subpopulation and their divergence among the non-Hawaiian  
40 subpopulations contributed significantly to population structure. These genes are mostly located  
41 at the chromosomal arms and high recombination rate correlates with their large polymorphism.  
42 Gene flow might also contribute to their diversity. Moreover, we identified signatures of strong  
43 positive selection in the F-box and csGPCR genes in the non-Hawaiian population using both  
44 neutrality tests and Extended Haplotype Homozygosity analysis. Accumulation of high frequency  
45 derived alleles in these genes were found in non-Hawaiian population, leading to divergence from  
46 the ancestral genotype found in Hawaiian strains. In summary, we found that F-box and csGPCR  
47 genes harbour a large pool of natural variants, which may be subjected to positive selection during  
48 the recent selective sweep in non-Hawaiian population. These variants are mostly mapped to the  
49 substrate-recognition domains of F-box proteins and the extracellular regions of csGPCRs, possibly  
50 resulting in advantages during adaptation by affecting protein degradation and the sensing of  
51 environmental cues, respectively.

52

53

54 **Introduction**

55 *C. elegans* genome contains over 350 F-box genes, compared to ~69 in human genome (Kipreos  
56 and Pagano 2000; Thomas 2006). This great expansion of the F-box gene family is the result of

57 tandem gene duplication, which have also been observed in plants (Xu, et al. 2009). F-box genes  
58 code for proteins sharing the F-box domain, a 42-48 amino acid-long motif that binds to Skp1  
59 proteins during the assembly of the SCF (Skp1-Cullin-F-box) E3 ubiquitin ligase complexes, which  
60 ubiquitinate protein substrates and target them for degradation. F-box proteins also contain  
61 substrate-binding domains, including FOG-2 homology (FTH) domain, F-box associated (FBA)  
62 domain, Leucine-rich repeats (LRR), WD40 repeats etc, which recruit the substrate protein to the  
63 E3 ubiquitin ligase (Kipreos and Pagano 2000). F-box genes and the SCF complex-mediated protein  
64 degradation have diverse functions in *C. elegans*, including the regulation of lifespan (Ghazi, et al.  
65 2007), developmental timing (Fielenbach, et al. 2007), sex determination (Jager, et al. 2004), and  
66 neuronal differentiation (Bounoutas, et al. 2009). The role of F-box proteins in the evolution of  
67 *Caenorhabditis* species has been noticed before in the study of sex determination and the rise of  
68 hermaphroditism. For example, through convergent evolution, *C. elegans* and *C. briggsae*  
69 independently evolved the hermaphroditic reproduction system by using two different F-box genes  
70 (*fog-2* and *she-1*, respectively) to suppress the translation of *tra-2* mRNA and promote  
71 spermatogenesis (Guo, et al. 2009). The intraspecific variation of F-box genes and their  
72 contribution to adaptation within *C. elegans* have not been studied.

73 Chemoreception is a major way for the nematodes to sense environmental cues and is  
74 mediated by the chemosensory-type seven-transmembrane G-protein-coupled receptors  
75 (csGPCRs). The *C. elegans* genome contains more than 1,300 csGPCR genes (Thomas and  
76 Robertson 2008), an exceptionally large number given the small size of its nervous system (302  
77 neurons in adult hermaphrodites). The csGPCR genes can be divided into four superfamilies and  
78 families (in parentheses): *Str* (*srd*, *srh*, *sri*, *srj*, and *str*), *Sra* (*sra*, *srab*, *srb*, and *sre*), *Srg* (*srg*, *srt*, *sru*,  
79 *srv*, *srx*, and *srx*), and *Solo* (*srw*, *srz*, *srbc*, *srsx*, and *srr*) (Vidal, et al. 2018). Evidence of extensive  
80 gene duplication and deletion and intron gain and loss were found in the *srh* genes among species  
81 in the *Caenorhabditis* genus, suggesting rapid interspecific evolution (Robertson 2000). Several of  
82 the csGPCRs were found to be essential for sensing some odors and pheromones (Sengupta, et al.  
83 1996; Kim, et al. 2009; Park, et al. 2012), but the function of most csGPCRs is unknown. The  
84 expansion of the csGPCR gene families and their roles in environmental sensing strongly suggest

85 their involvement in evolution, but the evidence for intraspecific positive selection is missing.

86           Thanks to the sampling efforts in the past, a collection of ~330 wild isolates of *C. elegans*  
87 have been obtained and sequenced (Crombie, et al. 2019; Stevens, et al. 2019). Their genomic  
88 sequences were recently made available (Cook, et al. 2017), providing an important resource for  
89 understanding the intraspecific evolution of *C. elegans*. Here we analyzed the nonsynonymous  
90 single nucleotide variants (SNVs) among the 330 wild isolates of *C. elegans* and compared the  
91 nucleotide diversity of genes belonging to different gene families. We found that the F-box and the  
92 csGPCR genes showed much larger diversity than an average gene. Population structure analysis  
93 divided the wild strains into eight non-Hawaiian and three Hawaiian subpopulations. F-box and  
94 csGPCR genes maintained a large amount of potentially ancestral variant sites in the Hawaiian  
95 strains and their divergence among the eight non-Hawaiian groups contributed significantly to  
96 population structure. Given their location at mostly the chromosomal arms, high recombination  
97 rate might have contributed to the large diversity of these genes. Furthermore, both neutrality  
98 tests and Extended Haplotype Homozygosity analysis identified signs of strong positive selection  
99 in the F-box and csGPCR genes; their derived alleles in non-Hawaiian population may have altered  
100 gene functions, leading to selective advantages. In summary, our systematic analysis suggests that  
101 F-box and csGPCR genes harbour a large pool of natural variants, which were subjected to positive  
102 selection during the recent selective sweep and adaptive evolution of the wild *C. elegans*  
103 population.

## 104 **Materials and Methods**

### 105 **Population genetic statistics**

106           To obtain the genomic data of *C. elegans* wild isolates, We used the hard-filtered VCF file  
107 (20180527 release) provided by the *Caenorhabditis elegans* natural diversity resource (CeNDR;  
108 <https://www.elegansvariation.org/>) (Cook, et al. 2017). We chose the hard-filtered VCF over the  
109 soft-filtered VCF to avoid including low-quality reads and variants with low coverage depth in our  
110 analysis. The hard-filtered VCF file contained in total 2,906,135 high-quality variants, including  
111 2,493,687 single nucleotide variants (SNVs) and 412,448 small indels, which were annotated by  
112 SnpEff (v4.3t) using the Ensemble WBcel235.94 genome assembly. About half (1,124,958) of the



113 SNVs were found in only one of the 330 isotypes, and they all occurred as homozygotes likely due  
114 to the hermaphroditism-driven homozygosity in *C. elegans*; we consider those SNVs as singleton  
115 (or private doubleton) and included them in most of our analysis. Among the 2,906,135 variants,  
116 594,265 occurred in the protein-coding region (CDS) and 2,311,870 occurred in non-coding regions.  
117 266,004 SNVs caused nonsynonymous mutations, 271,718 SNVs caused synonymous mutations,  
118 and 51,701 SNVs may affect mRNA splicing.

119         Among all SNV sites, we found that 665,368 SNVs in 11,199 genes had complete  
120 sequencing data in all 330 wild strains (660 alleles) using VCFtools (v0.1.13) (Danecek, et al. 2011).  
121 This dataset is referred to as “the complete-case dataset”. SNVs in the complete-case dataset were  
122 then subjected to calculation using DnaSP (Rozas, et al. 2017) and PopGenome (Pfeifer, et al. 2014).  
123 Both software produced similar results for nucleotide diversity ( $Pi$ ) and neutrality test statistic  
124 Tajima’s  $D$  for the synonymous, nonsynonymous, intron and UTR sites ([supplementary fig. S2](#),  
125 [Supplementary Material online](#)). Correlation analysis was done in R (v3.6.1) using Pearson  
126 correlation test (R function cor.test).

127         Because the analysis of the complete-case dataset removed 73% of the variant sites, we  
128 tested whether similar results can be obtained if we include variant sites with incomplete data. For  
129 an average strain, 76,872 (2.6%) out of the total 2,906,135 variant sites did not have high-quality  
130 sequencing data, and for an average variant site, 17.5 (2.6%) out of the 660 alleles (330 strains) did  
131 not have valid genotype; for the median site, 3.9 (0.6%) of the 660 alleles did not have genotype.  
132 So, the portion of missing data appears to be small, but stringent complete-case analysis discarded  
133 almost three quarters of the SNVs and possibly lost valuable information. To deal with this problem,  
134 we used the software VariScan (Hutter, et al. 2006), which can set a threshold for the number of  
135 alleles containing valid data for a given site. We first annotated the VCF to extract nonsynonymous  
136 SNVs and translated the VCF formatted file to Hapmap style using Tassel (v5.0) (Bradbury, et al.  
137 2007) to facilitate the calculation of  $Pi$  (NEI 1987), Tajima’s  $D$  (Tajima 1989), Fay and Wu’s  $H$  (Fay  
138 and Wu 2000) by VariScan. We then tested the threshold (NumNuc) at 200 and 450, which qualified  
139 sites with more than 200 and 450 alleles, respectively. These two conditions included 253,600 and  
140 235,283 nonsynonymous variants covering 18,797 and 18,643 genes, respectively, as compared to

141 the complete-case dataset that contained only 85,260 sites covering only 9,948 genes. Preserving  
142 more SNVs made  $P_i$  bigger, but Tajima's  $D$  and Fay and Wu's  $H$  appeared similar between the results  
143 obtained using the complete-case dataset and the conditioned full dataset ([supplementary fig. S2,](#)  
144 [Supplementary Material online](#)). Thus, the inclusion of variant sites with a few missing data points  
145 did not affect the results of neutrality test but added significant amount of genetic diversity data.  
146 For most analysis, we opted to use the full dataset that qualifies all sites with >200 valid alleles  
147 (referred to simply as "the full dataset").

148 To assess the significance of the  $D$  and  $H$  values, we performed coalescent simulations  
149 (R.R. 1990; Librado and Rozas 2009) for each gene based on the number of segregating sites using  
150 DnaSP v5. Confidence interval was set as 95% and the number of replicates was 1000. We found  
151 that vast majority (>95%) of the  $D$  value smaller than -2 and  $H$  value smaller than -20 have a  $p$  value  
152 lower than 0.05.

### 153 **Population structure analysis**

154 We first used PLINK (v1.9) (Purcell, et al. 2007) to convert the VCF file containing  
155 2,493,687 SNVs to a PED formatted file, which was then subjected to analysis using ADMIXTURE  
156 with the number of subpopulation (K value) ranging from 2 to 15. The cross-validation (CV) error  
157 for K=11 is the smallest. The population structure was visualized using pophelper web apps  
158 (v1.0.10) (Francis 2017). The 11 ancestral groups are: Europe\_1, Europe\_2, Europe\_3, Europe\_4,  
159 Europe\_5, Europe\_6, Hawaii\_1, Hawaii\_2, Hawaii\_3, North America and Australasia, which were  
160 named based on the geographic locations of most strains that carry the ancestral lineage  
161 ([supplementary fig. S3 and table S2, Supplementary Material online](#)). Out of the 330 strains, 266  
162 have one dominant ancestral lineage (one ancestral proportion > 0.5); the other 64 strains showed  
163 considerable mixing between at least three ancestral populations. "Hawaii\_1" and "Hawaii\_2" are  
164 the same as the previous "Hawaiian Volcano" and "Hawaiian Divergent" subpopulations, and  
165 "Hawaii\_3" is a combination of "Hawaiian Low" and "Hawaiian Invaded" subpopulation defined by  
166 Crombie, et al. (2019) ([supplementary table S3, Supplementary Material online](#)).

167 We then grouped the 330 wild isolates into Hawaiian and non-Hawaiian populations  
168 based on genetic difference in population structure instead of geographic locations

169 ([supplementary table S4, Supplementary Material online](#)). The Hawaiian population contains 45  
170 strains carrying a dominant lineage (admixture proportion > 0.5) from “Hawaii\_1” (10 strains),  
171 “Hawaii\_2” (10 strains), and “Hawaii\_3” (25 strains). The remaining 285 strains were grouped as  
172 the non-Hawaiian population. 64 of the 285 strains did not have a dominant ancestral lineage and  
173 contained extensive admixture among mostly the eight non-Hawaiian ancestral subpopulations. So,  
174 they were included in the non-Hawaiian population. The 45 strains in the Hawaiian population  
175 were all extracted from Hawaiian Islands except five strains (ECA36, JU3226, QX1211, ECA593, and  
176 XZ2019), and five strains that were extracted from Hawaiian Islands were included in the non-  
177 Hawaiian population (ECA928, ECA923, ECA369, QX1791, and XZ1515) because they are genetically  
178 very different from Hawaiian strains ([supplementary table S4, Supplementary Material online](#)).

179 This grouping of Hawaiian and non-Hawaiian populations were used for the computation  
180 of polymorphism ( $P_i$ ), Tajima’s  $D$ , and Fay and Wu’s  $H$  within each population and were used for  
181 extended haplotype homozygosity (EHH) analysis. For the calculation of  $F_{ST}$  and the gene flow and  
182 migration analysis among the 11 subgroups, we removed the strains without any ancestral  
183 proportion over 0.5 and kept 221 strains for the eight non-Hawaiian subpopulations and 45 strains  
184 for the three Hawaiian subpopulations.

### 185 **Phylogenetic analysis**

186 To visualize the phylogenetic relationship of the Hawaiian and non-Hawaiian populations,  
187 we used nonsynonymous SNVs from all 45 Hawaiian strains and 24 non-Hawaiian strains (3 strains  
188 with the biggest ancestral proportion from each subgroup). These 24 strains represented the  
189 genetic diversity of the non-Hawaiian population, allowing easy visualization without making the  
190 tree too crowded. We used Tassel to convert VCF file to Phylip interleaved format and constructed  
191 the neighbour-joining tree with SplitsTree4 (v4.15.1) (Huson and Bryant 2006). For the trees with  
192 just csGPCR and F-box genes, we used VCFtools to extract nonsynonymous SNVs of these genes  
193 according to their genomic location. 1,000 bootstrap replicates were performed to make the tree  
194 by SplitsTree. Edges with 100% bootstrap support are labelled with “100”.

195 Prior to tree construction, *Caenorhabditis briggsae*, *Caenorhabditis remanei*, and  
196 *Caenorhabditis brenneri* were chosen as the outgroups. The coding sequences of *C. elegans* genes

197 and their orthologs in *C. briggsae*, *C. remanei*, and *C. brenneri* were downloaded from WormBase  
198 (WS275) and then aligned using MegaX (Kumar, et al. 2018) to identify variants. We used a set of  
199 algorithms, including OrthoMCL, OMA, TreeFam, ParaSite-Compara, Inparanoid\_8, WormBase-  
200 Compara, and Hillier-set, to identify the orthologs of *C. elegans* genes in the other three species.  
201 We then checked each nonsynonymous SNV that existed in the *C. elegans* wild isolates (VCF file  
202 from CeNDR) for their presence in *C. briggsae*, *C. remanei*, and *C. brenneri* genomes. If the allele in  
203 the three species matched the *C. elegans* reference (N2) sequence, it was considered as a wild-  
204 type; if the allele matches the alternative sequence, the species carried that variant. If neither, we  
205 considered it missing for that SNV. In the case of one species having multiple orthologs of the *C.*  
206 *elegans* genes, we checked the SNV against all orthologs and if any of them had the alternative  
207 sequence, we considered the species to carry the variant. In total, we found 78,833, 74,274, and  
208 55,234 *C. elegans* SNVs in *C. briggsae*, *C. remanei*, and *C. brenneri* respectively and included these  
209 data in tree construction.

#### 210 **Gene families analysis and gene enrichment analysis**

211 Based on previous publications, we compiled a list of genes in the chemosensory GPCR  
212 (csGPCR) gene family (Vidal, et al. 2018), F-box gene family (Kipreos and Pagano 2000; Thomas  
213 2006), transcription factor family (Reece-Hoyes, et al. 2005), and protein kinase family (Manning  
214 2005). For tissue-specific genes, we collected genes whose expression are enriched in muscle,  
215 intestine, germline (Pauli, et al. 2006), and neurons (Von Stetina, et al. 2007). To compare  $P_i$ ,  
216 Tajima's  $D$ , and Fay and Wu's  $H$  values between different groups of genes, we performed non-  
217 parametric Wilcoxon's test to evaluate the statistical significance of the difference between groups.

218 For gene enrichment analysis, simple enrichment fold of csGPCR and F-box genes are  
219 calculated as observed gene frequency divided by expected gene frequency. We also subjected a  
220 list of specific genes to Gene Set Enrichment Analysis at wormbase.org (Angeles-Albores, et al.  
221 2018). Q value threshold cutoff was set at 0.1 to generate results of Tissue Enrichment Analysis  
222 (TEA), Phenotype Enrichment Analysis (PEA), and Gene Enrichment Analysis (GEA).

#### 223 **Fixation index ( $F_{ST}$ ) calculation**

224 Hudson's  $F_{ST}$  (Hudson, et al. 1992) were estimated using PopGenome. SNVs from the 266

225 strains that have an ancestral proportion bigger than 0.5 (221 non-Hawaiian and 45 Hawaiian  
226 strains) were subjected to the calculation. Prior to computation, we removed SNVs with valid  
227 genotype data in less than 100 strains to be consistent with VariScan analysis (NumNuc = 200).

### 228 **Gene flow analysis**

229 The migration events among subpopulations were analyzed by TreeMix (Pickrell and  
230 Pritchard 2012). We first used Stacks (Catchen, et al. 2013) to convert VCF file into the input format  
231 required by treemix. In each run, 1000 SNP blocks were set for all genes, and 100 SNP blocks were  
232 set for the analysis of csGPCR or F-box genes. Hawaii\_1 was used as the outgroup and three  
233 migration events were allowed. 1000 bootstrap replicates were performed for all five analyses.  
234 From the bootstrap results, we extracted the common migration events and calculated the  
235 probability of occurrence for each migration events among the 1000 replicates. The top three  
236 events were presented. We also calculated the average migration weight for each of the three  
237 events among the 1000 bootstrap replicates and the average weight were color-coded. To avoid  
238 possible interference by singletons and linkage disequilibrium, we repeated the analysis after  
239 removing the singletons and high linked SNPs (using plink --indep-pairwise 50 10 0.8) and got the  
240 very similar results.

### 241 **Estimation of recombination rate**

242 Recombination rate was estimated using an R package, FastEPRR (Gao, et al. 2016). The  
243 window size was set to be 50,000 bp and the sliding step length was set as 25,000 bp. After  
244 obtaining the estimated recombination rate for each genomic window, we assigned that  
245 recombination rate (Rho value) to the genes, whose CDS range overlap with the genomic window.

### 246 **Extended haplotype homozygosity (EHH) analysis**

247 We used EHH analysis to identify regions with selection footprints (Sabeti, et al. 2002).  
248 VCF file was first phased by beagle (v5.1) (Browning and Browning 2007) and then subjected to  
249 haplotype analysis using the rehh (v3.0) R package (Gautier and Vitalis 2012) to calculate the  
250 Integrated Haplotype Score (iHS) and the Cross-population Extended Haplotype Homozygosity  
251 (XPEHH) value. Strains were grouped as non-Hawaiian and Hawaiian as described above when  
252 computing iHS and XPEHH and unpolarized data were used to avoid making assumption of ancestry.

## 253 **Assessing the influence of varying population size and bottleneck effects**

254           Because different subpopulations have different numbers of strains, the varying  
255 population size may create bias when calculating neutrality statistics. We assessed this potential  
256 bias by comparing the SNV data extracted through different sampling schemes (scattering and  
257 pooling schemes), which were previously established (Stadler, et al. 2009; Li, et al. 2010). For  
258 scattered sampling, we randomly selected 5 strains from each of the 11 subpopulations based on  
259 population structure; for pooled sampling, we randomly selected 15 Hawaiian strains (3  
260 subpopulations) and 40 non-Hawaiian strains (8 subpopulations). We repeated the sampling 100  
261 times and then calculated the average  $P_i$ , Tajima's  $D$ , and Fay and Wu's  $H$ . The small differences in  
262 their values between the scattered and pooled sampling schemes suggest that the bias introduced  
263 by varying population size is not significant.

264           To assess the influence of demographic history and bottleneck effects on the neutrality  
265 tests, we simulated SNV data using the software MSMS (Ewing and Hermisson 2010) under  
266 constant population size model and bottleneck model. Parameters for the simulation were set  
267 according to previous studies (Andersen, et al. 2012). The command for simulating the two models  
268 are: `msms -N 20000 -ms 440 1000 -t 100 -r 150 -SAA 500 -Sp 0.5 -SAa 200` (constant) and `msms -N`  
269 `20000 -ms 440 1000 -t 100 -r 150 -SAA 500 -Sp 0.5 -SAa 200 -eN 0.015 0.01 -eN 0.020 1.0`  
270 (bottleneck). The simulated data were then plotted as site frequency spectra (SFS), which were  
271 compared to the empirical site frequency spectrum data for nonsynonymous SNVs in *C.elegans*.

272           We also used the software SweeD to estimate the selective sweep position. SweeD  
273 appeared to be robust against the confounding effect of bottleneck on selective sweep prediction  
274 (Nielsen, et al. 2005; Pavlidis, et al. 2013). We identified the selected sites with significant score  
275 using the likelihood threshold of 0.01. Genes that harbour these selected sites were then identified.

## 276 **Copy number variation (CNV) analysis**

277           The raw sequencing data of the 330 wild isolates were downloaded from NCBI  
278 (PRJNA549503). Sequencing reads were aligned to the reference genome of *C.elegans* using BWA-  
279 mem (v0.7.17). Structural variants were called using Manta (Chen, et al. 2016). The output VCF was  
280 merged by bcftools (v1.9). Structural variants with  $\leq$  5bp position difference and  $\leq$ 20% size

281 difference were merged together. Deletions and duplications were considered as copy number  
282 variation. Large deletions or duplications with more than 1 Mbp and chromosome-level variation  
283 were discarded. Derived CNV allele frequency were calculated using XZ1516 as the outgroup.

#### 284 **Protein domain structure and PROVEAN score**

285 We used PfamScan tools (<ftp://ftp.ebi.ac.uk/pub/databases/Pfam/Tools/>) to identify the  
286 F-box domain and the potential substrate-recognition domains (e.g. FTH, FBA, HTH-48, WD40  
287 repeats, LRR, etc) of F-box proteins. We used the TMHMM server  
288 (<http://www.cbs.dtu.dk/services/TMHMM/>) to predict the transmembrane domain (TM) and the  
289 intracellular and extracellular regions of csGPCR proteins. SNVs falling into these different domains  
290 were then filtered accordingly. The potential functional effect of the nonsynonymous mutations is  
291 predicted by the PROVEAN (Choi and Chan 2015) web server (PROVEAN v1.1.3) at  
292 <http://provean.jcvi.org/index.php>; a score lower than -2.5 is deemed as having significant effects  
293 on the function.

294

#### 295 **Results**

##### 296 **Large polymorphisms in F-box and chemosensory GPCR genes among *C. elegans* wild isolates**

297 From the sequencing data of 330 distinct isotypes of *C. elegans* wild strains (VCF files of  
298 20180527 release on CeNDR), we identified in total 2,493,687 SNVs, including 271,718 SNVs  
299 synonymous and 266,004 nonsynonymous SNVs (fig. 1A). By analyzing the distribution of the  
300 variants across 20,222 protein-coding genes, we found that 1,143 genes with average CDS length  
301 of 0.6 kb (0.06 ~ 5.7 kb) had no nonsynonymous mutation or small indels in CDS; within the 1,143  
302 genes, 302 with average gene length of 1.4 kb (0.07 ~ 14 kb) did not have any SNVs or small indels  
303 in any of the CDS, intron, and UTR regions (53 of the 302 genes has no introns). The absence of  
304 coding variations may be explained by the small size of these genes (the genome average for CDS  
305 length is 1.2 kb and for gene length is 3.1 kb) and the fact that they tend to be enriched in genomic  
306 regions with low recombination rate ( $Rho = 1.4$  on average; see below for the genomic distribution  
307 of  $Rho$ ). The lack of variation might also be partly due to purifying selection, as gene ontology and  
308 phenotype analysis found that many of these genes function in protein-protein interactions and

309 are essential for cell division and germline development ([supplementary fig. S1, Supplementary](#)  
310 [Material online](#)).

311 Next, we focused on the 2,493,687 SNVs and calculated nucleotide polymorphism ( $Pi$ )  
312 for each protein-coding gene and found that  $Pi$  is significantly bigger in introns and UTRs compared  
313 to synonymous and nonsynonymous mutations, suggesting that coding regions had much less  
314 variation than non-coding regions ([supplementary fig. S2A, Supplementary Material online](#)). For  
315 nonsynonymous SNVs, we found that the F-box and csGPCR genes have much larger diversity than  
316 average genes ([fig. 1B-E; supplementary table S1, Supplementary Material online](#)). For example,  
317 among the 235 genes whose  $Pi$  is bigger than 0.01, 46 of them are F-box genes, indicating an over  
318 ten-fold enrichment. For the 1685 genes with  $Pi$  bigger than 0.0025, F-box genes and csGPCRs  
319 showed 4.91- and 2.27-fold enrichment, respectively ([fig. 1A](#)). Overall, compared to other gene  
320 families like the transcription factor (TF) genes (891) and the protein kinase genes (402), F-box  
321 genes (336) and the csGPCRs (1301) on average have significantly bigger  $Pi$  ([fig. 1D and E](#);  
322 significance by a non-parametric Wilcoxon's test). Large genetic diversity among the wild isolates  
323 hints that the F-box and csGPCR genes might contribute to the adaptation of *C. elegans* in the  
324 natural environment.

325 The csGPCRs can be further divided into *Str*, *Sra*, *Srg*, and *Solo* superfamilies, among  
326 which the Solo superfamily genes have the biggest  $Pi$  ([fig. 1F](#)). Within the *Solo* superfamily, *Srw*-  
327 type csGPCRs appeared to have the largest polymorphism on average, although the mean of  $Pi$  is  
328 not significantly bigger than *Srz* and *Srbc* subfamilies. Interestingly, *Srw* genes appeared to be more  
329 ancestral than the other csGPCR families and likely originated from the large Rhodopsin GPCR  
330 family before the split of the nematode lineage (Krishnan, et al. 2014). Unlike other csGPCRs, *Srw*  
331 genes have clear phylogenetic relationship with conserved FMRamide/peptide receptors found in  
332 insects and vertebrates (Robertson and Thomas 2006); variations in *Srw* genes might lead to  
333 selective advantages in peptide sensing.

### 334 **Genetic divergence of F-box and csGPCR genes among *C. elegans* subpopulations**

335 We next conducted population structure analysis on the 330 wild isolates and found 3  
336 Hawaiian and 8 non-Hawaiian subpopulations ([supplementary fig. S3, Supplementary Material](#)



337 [online](#)), which generally agrees with a recent study that used 276 strains and also found 11 distinct  
338 genetic groups (Crombie, et al. 2019). The three Hawaiian subpopulations contain strains mostly  
339 found in Hawaiian islands with a few exceptions. Among the non-Hawaiian subpopulations, some  
340 groups (e.g. “Europe\_1” and “Europe\_2”) are heavily mixed with populations around the world,  
341 but others show correlation between geographical separation and genetic divergence. For example,  
342 “Europe\_4” group represented strains mostly found in France, and “Europe\_5” and “Europe\_6”  
343 strains were mostly found on Iberian Peninsula and Portuguese islands. Similarly, strains extracted  
344 from North American shared the same “North\_America” ancestral group.

345           Phylogenetic analysis using all nonsynonymous SNVs and neighbor-joining methods (Huson  
346 and Bryant 2006) showed the evolutionary relationship among the *C. elegans* wild isolates. We  
347 rooted the tree using *C. briggsae*, *C. remanei* and *C. brenneri* as outgroups ([fig. 2A](#); see Materials  
348 and Methods) to show that Hawaiian strains, especially “Hawaii\_1” and “Hawaii\_2” groups, are  
349 genetically closer to the sister species and contain more ancestral variations than the non-Hawaiian  
350 strains. Two strains in the “Hawaii\_1” group, XZ1516 and ECA701, are highly divergent from other  
351 Hawaiian strains and appear to carry the most ancestral polymorphisms in among the *C. elegans*  
352 wild isolates.

353           “Hawaii\_3” strains cluster more closely with non-Hawaiian strains ([fig. 2A](#)) and are more  
354 admixed with non-Hawaiian subpopulations ([supplementary fig. S3, Supplementary Material](#)  
355 [online](#)) compared to “Hawaii\_1” and “Hawaii\_2” strains. Gene flow analysis identified migration  
356 events from “North American” and “Europe\_2” to “Hawaii\_3”, supporting the admixing of  
357 “Hawaii\_3” with non-Hawaiian lineages ([supplementary fig. S4A, Supplementary Material online](#)).

358           Compared to the genomic average, divergence between the Hawaiian and non-Hawaiian  
359 strains are more profound in F-box and csGPCR genes, as shown in expanded neighbor-joining net  
360 and increased phylogenetic distance ([fig. 2B and C](#)). Within csGPCRs, *Srw* genes appear to show  
361 even greater divergence among the subpopulations ([fig. 2D](#)). Moreover, the phylogenetic trees  
362 constructed using nonsynonymous SNVs of csGPCR or F-box genes had different topologies from  
363 the tree of all genes ([fig. 2D](#)). For example, looser clustering patterns and more admixture between  
364 Hawaiian and non-Hawaiian strains were observed for the F-box and *Srw* genes, suggesting that

365 these genes may have a distinct evolutionary history than other genes.

366           Based on the population structure and genetic grouping, we divided the 330 wild isolates  
367 into Hawaiian (45 strains) and non-Hawaiian (285) populations ([supplementary table S4](#),  
368 [Supplementary Material online](#); see Materials and Method) and calculated polymorphism for the  
369 two populations using nonsynonymous SNVs. Hawaiian population showed over two-fold larger  $Pi$   
370 than non-Hawaiian population across all genes ([fig. 3A](#)), which is consistent with the hypothesis  
371 that recent selective sweep reduced variation in non-Hawaiian population, while Hawaiian strains  
372 kept part of the ancestral diversity (Cook, et al. 2017; Crombie, et al. 2019). “Hawaii\_3” has lower  
373 diversity than the other two Hawaiian subpopulations, likely because “Hawaii\_3” strains are  
374 genetically more similar to the non-Hawaiian strains. Interestingly, the diversity of F-box and  
375 csGPCR genes is bigger than the TF, protein kinase genes, or an average gene in both non-Hawaiian  
376 and Hawaiian populations ([fig. 3A](#)). This large genetic diversity is correlated with the abundance of  
377 segregating sites, as F-box and csGPCR genes carried many more sites than an average gene  
378 ([supplementary fig. S5, Supplementary Material online](#)). For example, the *Srw* genes of the  
379 csGPCRs and the F-box genes both have almost four times more variant sites than the average of  
380 all genes. In extreme cases, *srw-57* has only 1071 nucleotide in the CDS but carries 124  
381 nonsynonymous variants; *fbxb-53* is 1020-bp long in the CDS and has 207 segregating sites.

382           We also found that a large number (6.3 per gene on average) of segregating sites only  
383 existed in Hawaiian strains and much fewer (3.1 per gene) sites are exclusively non-Hawaiian; a  
384 significant number (4.6 per gene) of sites are shared between some Hawaiian and non-Hawaiian  
385 strains ([fig. 3B](#)). As expected, F-box and csGPCR genes have a lot more exclusively Hawaiian sites  
386 than the TF or protein kinase genes. However, they do not carry many exclusively non-Hawaiian  
387 sites, and the large diversity of the F-box and csGPCR genes in non-Hawaiian strains mostly result  
388 from the large number of sites originated from the Hawaiian population ([fig. 3B](#)). This finding  
389 supports that the Hawaiian *C. elegans* (especially the “Hawaii\_1” and “Hawaii\_2” groups)  
390 maintains a relatively large pool of ancestral variation, and polymorphisms in the F-box and csGPCR  
391 genes contribute significantly to this ancestral diversity. Although selective sweep removed many  
392 ancestral alleles in non-Hawaiian population, the F-box and csGPCR genes still kept a significant

393 number of variant sites, which might be related to adaptation.

394 Fixation index  $F_{ST}$  is a measure for genetic difference between populations.  $F_{ST}$  for F-box  
395 and csGPCR genes were similar to other gene families when just considering Hawaiian and non-  
396 Hawaiian as two populations ([fig. 3C](#)). ~80% of all genes have  $F_{ST} < 0.2$ . We reasoned that this may  
397 be caused by large divergence among the subpopulations within each population. When  
398 calculating for the eight non-Hawaiian subpopulations ([supplementary table S5, Supplementary](#)  
399 [Material online](#)), only ~60% of the genes have  $F_{ST} < 0.2$  and that F-box and csGPCR genes, especially  
400 *Srw* genes, have much higher mean  $F_{ST}$  than TF and protein kinase genes or an average gene ([fig.](#)  
401 [3D and 3F](#)). This finding suggests that the polymorphism of F-box and csGPCR genes contribute  
402 significantly to the population structure of the non-Hawaiian strains. Their divergence among  
403 subpopulations and fixation within subpopulation may be linked to local adaptation. For example,  
404 csGPCR *srw-66* ( $F_{ST} = 0.76$ ) contains 24 variants that were found in >75% of the strains in the  
405 “North\_America” group and >55% of the “Europe\_2” strains but not in any other non-Hawaiian  
406 groups. Similarly, F-box gene *fbxa-181* ( $F_{ST} = 0.69$ ) has 14 SNVs that are found in 73% of the  
407 “Europe\_6” strains and not in any other groups.

408 Among the three Hawaiian subpopulations, the mean  $F_{ST}$  values of F-box and csGPCR *Srw*  
409 genes appear to be significantly lower than other gene families or the genomic average ([fig. 3E and](#)  
410 [3F](#)), which may be explained by their large diversities even within the same Hawaiian group ([fig.](#)  
411 [3A](#)). Thus, the big variation of F-box and *Srw* genes do not seem to follow the population structure  
412 among the three Hawaiian subpopulations and they are not likely fixed within the Hawaiian groups.

413 Gene flow also helped shape the diversity of the F-box and csGPCR genes. F-box genes  
414 have extensive gene flow between Hawaiian and non-Hawaiian populations in both directions  
415 ([supplementary fig. S4B, Supplementary Material online](#)), which is consistent with the great  
416 number of shared segregating sites in F-box genes between the two populations ([fig. 3B](#)). On the  
417 other hand, csGPCR genes had only gene flow within the non-Hawaiian subpopulations.  
418 Interestingly, when constructing the maximum-likelihood population tree for gene flow analysis, we  
419 found that the tree structure changed after removing the variants in F-box or csGPCR genes.  
420 Instead of staying as a branch outside of the eight non-Hawaiian subpopulations, the “Hawaii\_3”

421 group moved into the non-Hawaiian groups and was placed next to “Europe\_2” and  
422 “North\_America” ([supplementary fig. S4C, Supplementary Material online](#)). This finding supports  
423 that variations in the F-box and csGPCR genes played critical roles in distinguishing “Hawaii\_3”  
424 strains from the non-Hawaiian populations and contributed significantly to intraspecific diversity.

#### 425 **High recombination rate may contribute to the polymorphism of the F-box and csGPCR genes**

426 We next asked whether chromosomal locations of the csGPCR and F-box gene loci had  
427 effects on their diversity. Most of the csGPCR are located on chromosome II (13%), IV (9%), and V  
428 (70%), and most of F-box genes are located on the arms of chromosome II (33%), III (22%), and V  
429 (26%) ([fig. 4A](#)). We found that the chromosomal arms (the two distal quarters) have larger  
430 polymorphism than the center (the middle half) for all chromosomes, which is likely due to high  
431 frequency of recombination (Begun and Aquadro 1992; McGaugh, et al. 2012) ([fig. 4B](#)). Thus, the  
432 location of almost all F-box genes in the chromosomal arms may contribute to their high genetic  
433 diversity. csGPCR genes are also relatively concentrated on the arms, especially on chromosome II  
434 and V, although to a lesser extent than F-box genes. For example, over 80% of the *Srw* genes are  
435 located on the arms of V. This chromosomal clustering is likely the result of rapid gene duplication  
436 (Robertson and Thomas 2006). In contrast, protein kinase and TF genes are more evenly spread  
437 out across chromosomes ([fig. 4A](#)).

438 We estimated the recombination rate for Chromosome II, III, and V using the FastEPRR  
439 software (Gao, et al. 2016) and all nonsynonymous SNVs. As expected, chromosomal arm regions  
440 have higher estimated recombination rate ( $\rho$  or *Rho*) than the center ([fig. 4C](#)). Interestingly, the left  
441 arm of chromosome III where many F-box genes are located have significantly higher  
442 recombination rate than the right arm, and this high *Rho* value of F-box genes appear to correlate  
443 with the large polymorphism ([fig. 4D](#)). Similarly, the arms of Chromosome V, which harbour many  
444 csGPCR genes, have high recombination rate, which are correlated with large *Pi* ([fig. 4D](#)). Therefore,  
445 because of the clustering of F-box and csGPCR genes on the chromosomal arms, recombination  
446 likely contributed to their large diversity.

447 The analysis of copy number variants (CNVs) supports the idea that rapid expansion of F-  
448 box and csGPCR gene families led to large genetic diversity. By analysing the structural variants, we

449 found 8740 CNVs in 5586 genes. 185 (1.99 fold enrichment) F-box genes and 552 (1.54 fold  
450 enrichment) csGPCRs carried CNVs ([supplementary fig. S6A, Supplementary Material online](#)).  
451 Moreover, the average number of CNVs per gene is also higher for F-box and csGPCR genes  
452 compared to genomic average. Thus, large genetic polymorphisms for these genes were reflected  
453 in both the abundance of SNVs and CNVs.

#### 454 **Signs of strong positive selection on F-box and csGPCR genes**

455 Previous studies hypothesized that positive selection of alleles that confer fitness  
456 advantages under human influence reduced genetic variations in *C. elegans* (Andersen, et al. 2012),  
457 but what genes are under selection is not clear. Using the nonsynonymous SNVs, we performed  
458 neutrality tests and calculated Tajima's  $D$  and Fay and Wu's  $H$  values for every gene. The  $D$  value  
459 reflects the difference between expected and observed diversity (Tajima 1989) and the  $H$  value  
460 measures the abundance of high-frequency derived allele (Fay and Wu 2000). Negative  $D$  and  $H$   
461 values are both indicators of selective sweep and positive selection. To calculate the  $H$  value, we  
462 used XZ1516 or ECA701 as the outgroup, because these two strains likely carry the most ancestral  
463 genotypes ([fig. 2](#)).  $H$  values calculated using the two strains as the outgroup were similar  
464 ([supplementary fig. S7, Supplementary Material online](#)), and in the following analysis we used  
465 XZ1516 as the outgroup.

466 In the neutrality tests, we found that Tajima's  $D$  were negative for the nonsynonymous  
467 SNVs for most (>85%) genes and Fay and Wu's  $H$  were negative for ~50% genes ([supplementary  
468 table S1, Supplementary Material online](#)). This finding is consistent with the chromosome-wide  
469 sweep that occurred across the genome (Andersen, et al. 2012). Interestingly, F-box and csGPCR  
470 genes are overrepresented among the genes with significantly negative  $D$  and  $H$  values ([fig. 5A](#)).  
471 For example, among the 1038 genes with  $H < -20$ , 260 of them are csGPCRs (3.62-fold enriched)  
472 and 67 are F-box genes (3.61-fold enriched). Gene ontology analysis consistently showed strong  
473 enrichment (> 5 fold) in genes involved in sensory perception of smell and chemical stimulus  
474 ([supplementary fig. S8, Supplementary Material online](#)).

475 Compared with the TF and protein kinases genes or the genomic average, F-box and  
476 csGPCR genes have significantly lower  $D$  and  $H$  values ([fig. 5B and C](#)), suggesting that the csGPCR

477 and F-box genes appear to be under stronger positive selection than other genes. Within the  
478 csGPCRs, Solo superfamily genes have the lowest  $H$  values and within the *Solo* superfamily, *Srw*-  
479 type csGPCRs have the lowest  $H$ , indicating that *Srw* genes may be under the strongest positive  
480 selection among all csGPCRs (fig. 5D and E). Putative functions of the *Srw* genes in sensing  
481 environmental peptides suggest they may be involved in adaptation.

482 Within the F-box genes, we did not observe significant difference in either  $D$  or  $H$  values  
483 or polymorphisms among the genes in *fbxa*, *fbxb*, and *fbxc* subfamilies (supplementary fig. S9A,  
484 Supplementary Material online). F-box proteins share an F-box domain, which complexes with Skp  
485 and Cullin to form the SCF complex that mediates protein ubiquitination and degradation. Five out  
486 of the 20 Skp-related genes in *C. elegans* (*skr-3*, *4*, *5*, *10*, and *15*) and three out of the 6 Cullin genes  
487 (*cul-1*, *3*, and *6*) have very negative  $H$ , suggesting strong selective sweep (supplementary fig. S9B,  
488 Supplementary Material online). Thus, components of the ubiquitination-proteasome system (UPS)  
489 may co-evolve among the *C. elegans* wild isolates; genetic variations in UPS genes may alter the  
490 homeostasis of target proteins, leading to certain advantages during selection.

491 Another line of evidence for positive selection is the excess of nonsynonymous SNVs  
492 compared to synonymous SNVs, which is particularly obvious for F-box genes (supplementary fig.  
493 S10, Supplementary Material online). Polymorphism for synonymous SNVs is slightly bigger than  
494 nonsynonymous SNVs for genomic average, and the difference is more obvious in TF and protein  
495 kinase genes, which may be under purifying selection. F-box genes, however, have bigger  $Pi$  and  
496 more negative  $D$  and  $H$  values for nonsynonymous SNVs compared to synonymous SNVs,  
497 supporting that F-box genes are under positive selection. Interestingly, csGPCRs did not show this  
498 pattern and appeared to have a lot of synonymous SNVs, which have also very negative  $H$  values.  
499 The abundance of synonymous SNVs in csGPCRs may result from high recombination rate at the  
500 chromosomal arms; some synonymous SNVs might also be positively selected due to effects on  
501 codon usage and gene expression levels as previously seen in mammals (Resch, et al. 2007).

#### 502 **Positive selection of F-box and csGPCR genes in non-Hawaiian population**

503 The above analysis detected signs of strong positive selection in F-box and csGPCR genes  
504 among all wild strains, we next found that Fay and Wu's  $H$  value is more negative in the non-

505 Hawaiian strains than the Hawaiian strains across all genes ([fig. 6A](#)). “Hawaii\_3” group appeared  
506 to have lower  $H$  values than “Hawaii\_1” and “Hawaii\_2” groups probably due to the admixing with  
507 the non-Hawaiian strains. These observations are consistent with the selective sweep in non-  
508 Hawaiian populations. Genes in the F-box and csGPCR (especially *Srw*) genes showed much more  
509 negative  $H$  than the genomic average not only in non-Hawaiian strains but also in Hawaiian strains,  
510 suggesting that they may also be under positive selection within the Hawaiian populations when  
511 considering XZ1516 as the most ancestral strain.

512           Negative  $H$  values reflects the excess of high-frequency derived alleles. Indeed, the  
513 number of high-frequency (>50%) SNVs distinct from the ancestral allele in XZ1516 is much higher  
514 in csGPCR and F-box genes than in an average gene for both Hawaiian and non-Hawaiian  
515 populations ([fig. 6B](#)). The large number of both segregating sites and high-frequency derived alleles  
516 in csGPCR and F-box genes suggest that they evolve more rapidly than other parts of the genome  
517 and may contribute to the adaptation to a changing environment in *C. elegans*. Analysis of copy  
518 number variants (CNVs) is consistent with the above results. The allele frequency of derived CNVs  
519 is much larger for F-box and csGPCR genes than the genomic average in both the entire population  
520 and the non-Hawaiian population of wild isolates, with XZ1516 as the outgroup ([supplementary](#)  
521 [fig. S6B and C, Supplementary Material online](#)).

522           Since the Hawaiian populations contained relatively more ancestral polymorphism than  
523 the non-Hawaiian population, we next asked whether F-box and csGPCR genes accumulated high-  
524 frequency derived alleles in non-Hawaiian population when considering Hawaiian strains as the  
525 ancestral population. We found that  $H$  values calculated using a representative “Hawaii\_1”  
526 (ECA396) or “Hawaii\_2” (ECA742) strain as the outgroup were significantly more negative in F-box  
527 and csGPCR genes than genomic average, indicating positive selection within the non-Hawaiian  
528 population, relative to the Hawaiian populations ([fig. 6C and D](#)). These  $H$  values were generally less  
529 negative than the  $H$  values calculated using XZ1516 or ECA701 as the outgroup, confirming that  
530 “Hawaii\_1” and “Hawaii\_2” strains are less distant to the non-Hawaiian strains than the two  
531 outliers XZ1516 and ECA701.

532 **Different selection pressure on different domains of F-box and csGPCR proteins**



533 F-box proteins all have two distinct functional domains, a N-terminal F-box domain that  
534 mediates the assembly of SCF complex and a C-terminal substrate recognition domain that binds  
535 the substrate proteins and target them for ubiquitination. Using Pfam scan, we identified the F-box  
536 domain and putative substrate-binding domain (e.g. FTH, FBA, etc) in all F-box proteins and  
537 extracted the nonsynonymous SNVs mapped to these domains. Interestingly,  $Pi$  is much bigger and  
538  $H$  much more negative for the SNVs mapped to the substrate-binding domain compared to those  
539 mapped to the F-box domain (fig. 7A). The enrichment of variants and stronger positive selection  
540 in the substrate-recognition domains supports the hypothesis that variations in the F-box genes  
541 may result in selective advantages by altering the ubiquitination and degradation of certain cellular  
542 proteins.

543 As an example, F-box gene *fbxb-49* ( $H = -53.03$ ) contains 48 high frequency derived sites  
544 in the non-Hawaiian population (considering XZ1516 as the outgroup) and the frequency of those  
545 sites within the Hawaiian population are much lower (fig. 7C). Most of those sites are also high  
546 frequency derived sites when using a “Hawaii\_1” (ECA396) or “Hawaii\_2” (ECA742) strain as the  
547 outgroup. So, selective sweep may have fixed those sites in the non-Hawaiian population. Very few  
548 variants are located in the region encoding F-box domain, while many more sites occurred in  
549 domains that are responsible for recognizing the substrate protein. Four of the sites have PROVEAN  
550 (Protein Variation Effect Analyzer) score (Choi and Chan 2015) below -2.5, suggesting potentially  
551 significant functional impacts.

552 Similarly, we mapped nonsynonymous SNVs onto the domain structure of csGPCRs and  
553 found that SNVs affecting the extracellular domains or intracellular tails of csGPCRs have larger  $Pi$   
554 and more negative  $H$  than SNVs mapped to the transmembrane (TM) domains (fig. 7B).  
555 Conservation of amino acid sequences in the TM domain is expected, as the membrane protein  
556 topology may be maintained by purifying selection. Variation in the extracellular domains, which  
557 are under stronger positive selection, could result in changes in the ability to sense environmental  
558 signals, which may confer fitness advantages. As an example, *srw-68* ( $H = -82.33$ ) contains 44 high  
559 frequency derived sites in the non-Hawaiian population with XZ1516 as the outgroup, and 16 of  
560 them are also high frequency derived sites compared to ECA396 and ECA742 (fig. 7D). All of those



561 sites are near fixation among the non-Hawaiian strains and mostly mapped to the extracellular  
562 regions. Four sites have PROVEAN scores below -2.5.

563 **Extended Haplotype Homozygosity analysis identified selection footprints in F-box and csGPCR**  
564 **genes**

565 In addition to the neutrality tests, we also applied the Extended Haplotype Homozygosity  
566 (EHH) method (Sabeti, et al. 2002) to detect the selection footprints among the nonsynonymous  
567 SNVs across the genome. EHH identifies long-range haplotypes and can discover genomic regions  
568 with strong selective sweep. First, we computed the integrated Haplotype Score (iHS) for both non-  
569 Hawaiian and Hawaiian strains ([supplementary table S7, Supplementary Material online](#)).  
570 Interestingly, the regions that showed extended haplotype homozygosity (high |iHS| scores) were  
571 in the left arms of chromosome II and III, where F-box genes are located, and the two arms of  
572 chromosome V, where most csGPCRs are located ([fig. 8A and B](#)). Indeed, among the 335 genes  
573 carrying at least one SNV with |iHS| > 2 in non-Hawaiian strains, csGPCR and F-box genes are  
574 enriched for 4.5 and 1.5 fold, respectively ([fig. 8D](#)), indicating that these genes may be under  
575 selective pressure in the recent sweep among non-Hawaiian strains. Nevertheless, csGPCR and F-  
576 box genes may also be selected within the Hawaiian strains because of their enrichment in the  
577 regions with high |iHS| in the Hawaiian population ([fig. 8D](#)).

578 This genomic pattern of haplotype homozygosity is supported by that Fay and Wu's *H*  
579 values of genes on the left arms of II and III are much more negative than the center and right arms  
580 and that *H* values of genes on both arms of V are smaller than the center of V ([fig. 8E](#)). F-box and  
581 csGPCR may be driving this pattern, because they tend to have even more negative *H* than average  
582 genes in the arms. In addition, Chromosome V generally had much more negative *H* than other  
583 chromosomes, suggesting signs of strong selective sweep, which is consistent with a previous  
584 observation of high haplotype homozygosity of V among non-Hawaiian strains (Andersen, et al.  
585 2012). Selection of the over 1000 csGPCR genes on V may explain this chromosomal pattern.

586 Genes that are under selection in the non-Hawaiian population but not in the Hawaiian  
587 population may be associated with the adaptation. So, we conducted the XP-EHH (Cross-  
588 Population EHH) test to identify SNVs with such selection pattern and found the left arm of

589 chromosome II and both arms of V contain regions with significantly positive XP-EHH values ([fig.](#)  
590 [8C](#)). F-box and csGPCR genes are highly enriched in those regions. 18 out of the 41 genes carrying  
591 SNVs with XP-EHH > 2 on the left arm of II are F-box genes. The enrichment of F-box and csGPCR  
592 genes is even more obvious if we only consider the outlier SNVs (the top 0.05%) or count all genes  
593 in extended regions that connect significant SNVs within a 50-kb range (Mohd-Assaad, et al. 2018)  
594 ([fig. 8D](#)). In summary, both neutrality test and EHH analysis identified signs of strong positive  
595 selection on F-box and csGPCR genes in non-Hawaiian population.

596 As examples of highly selected genes, F-box gene *fbxa-85* carries 58 SNVs with  
597 significantly positive XP-EHH score (XP-EHH > 2;  $p < 0.05$ ); 13 and 29 are high-frequency derived  
598 sites among non-Hawaiian strains using a “Hawaii\_1” and “Hawaii\_2” strain as the outgroup,  
599 respectively. Most of the sites occurred in the FTH domain involved in substrate binding and none  
600 in the F-box domain ([fig. 8F](#)). Similarly, sGPCR *srw-56* contains 67 SNVs with high XP-EHH; 36 and  
601 24 of those SNVs are high frequency derived sites in non-Hawaiian population with a “Hawaii\_1”  
602 and “Hawaii\_2” strain as the outgroup, respectively. Most of them occurred in the extracellular  
603 domains of SRW-56 ([fig. 8G](#)).

#### 604 **Selection patterns in F-box and csGPCR genes are not likely affected by varying population size** 605 **and demographic history**

606 Varying population size and demographic history are known confounding factors for  
607 predicting selective sweep (Wakeley and Aliacar 2001; Przeworski 2002; Nielsen, et al. 2005). We  
608 next addressed whether these two factors confounded our neutrality test results. To assess  
609 whether the varying number of strains in the 11 subpopulation among the wild isolates had effects  
610 on the neutrality test statistics, we selected strains and SNVs using two different sampling schemes  
611 (scattering and pooling schemes) according to previous studies (Stadler, et al. 2009; Li, et al. 2010)  
612 (see Materials and Methods). Polymorphism, Tajima’s  $D$ , and Fay and Wu’s  $H$  calculated using the  
613 samples obtained with the two sampling methods are very similar ([supplementary fig. S11](#),  
614 [Supplementary Material online](#)), indicating that the varying population sizes among the  
615 subpopulation do not significantly confound our results.

616 Previous population history analysis of *C. elegans* found that wild isolates in non-

617 Hawaiian population may have suffered a strong decline in population size about 10,000  
618 generations ago (Thomas, et al. 2015). To assess the confounding effect of the potential bottleneck  
619 on selection detection, we simulated SNV data under neutrally constant population size model or  
620 bottleneck model and plotted site frequency spectra (SFS). Bottleneck leads to the enrichment of  
621 low and high frequency alleles in simulated data as expected ([supplementary fig. S12](#),  
622 [Supplementary Material online](#)). However, SFS pattern of the empirical SNV data of non-Hawaiian  
623 populations are more similar to the constant population size model, suggesting that the potential  
624 bottleneck effect may not significantly change the site frequency in the *C. elegans* wild isolates we  
625 analyzed.

626 We next predicted selective sweep sites based on the site frequency spectrum using the  
627 software SweeD, which analyzes composite likelihood and is robust against recombination and  
628 demographic assumption (Nielsen, et al. 2005). We found that selected sites at the significance  
629 threshold of 1% are mostly located in the arms of chromosomes ([supplementary fig. S13](#),  
630 [Supplementary Material online](#)), where F-box and csGPCRs are enriched, which is consistent with  
631 the results of neutrality tests and EHH analysis. Among the 564 significant sites located in 233 genes  
632 (mean  $\alpha$  score, an indicator of selection coefficient, is 31), 31 sites are mapped to 10 F-box genes  
633 (2.5 fold enrichment) with an average  $\alpha$  score at 54. csGPCR genes carry 28 significant sites with  
634 an average  $\alpha$  score at 63. Thus, even considering demographic history, F-box and csGPCR genes  
635 still show strong selection during the sweep.

636

## 637 Discussion

638 The nematode *C. elegans*, which is traditionally used as a model organism for molecular  
639 biology, has emerged as an important organism in studying the genetic mechanisms of evolution.  
640 The genomic sequences of over 50 species in the *Caenorhabditis* genus and 330 wild *C. elegans*  
641 isotypes provided an important resource for understanding the evolutionary history of *C. elegans*  
642 and nematodes in general, e.g. the rise of self-fertile hermaphroditism through convergent  
643 evolution in *C. elegans* and *C. briggsae* (Nayak, et al. 2005) and the balancing selection maintaining  
644 genetic incompatibilities among *C. elegans* wild isolates (Seidel, et al. 2008). In this study, we aimed

645 to identify genes or gene families that have large diversity among the *C. elegans* wild isolates and  
646 show signs of positive selection during the recent selective sweep. The F-box gene family and  
647 chemosensory GPCR genes emerged from our analysis, suggesting that they may contribute to the  
648 adaptation of wild *C. elegans*.

#### 649 **Intraspecific positive selection of F-box genes**

650 Compared to insects and vertebrates, *C. elegans* genome contains a large number of F-  
651 box genes. This increased number of F-box genes might have allowed selective recognition of target  
652 proteins for degradation in a precisely controlled manner and the increased precision in the  
653 regulation of protein turnover might have contributed to nematode evolution. In fact, an earlier  
654 study calculated the nonsynonymous (*dN*)/synonymous (*dS*) ratio among paralogous F-box genes  
655 in *C. elegans* reference genome (the N2 strain) and found evidence of purifying selection in the  
656 sequence encoding the F-box domain and positive selection in the substrate recognition domain  
657 (Thomas 2006). Our studies using the genomic sequences of 330 *C. elegans* wild isolates found  
658 large intraspecific variations in the F-box genes and signs of strong positive selection in non-  
659 Hawaiian population, which may imply their roles in adaptation. Interestingly, variants in the  
660 substrate-binding domain showed larger polymorphism and stronger selection than the variants in  
661 the F-box domain, supporting that the function of substrate recognition but not Skp1 binding is the  
662 target of positive selection.

663 What kind of selective advantages can variants in F-box genes confer? Recent studies  
664 suggested a link between the SCF complex and antimicrobial immunity in *C. elegans*, because the  
665 transcription of many components of the SCF complex were upregulated upon Orsay virus and  
666 *Nematocida parisii* (a microsporidia fungi) infections (Chen, et al. 2017) and RNAi knockdown of  
667 the core SCF components promoted the infection (Bakowski, et al. 2014). Among the upregulated  
668 genes are F-box genes that show strong signs of positive selection in our studies, e.g. *fbxc-19*, *fbxa-*  
669 *75*, *fbxa-135*, *fbxa-158*, *fbxa-165*, and *fbxa-182*, whose Fay and Wu's *H* are all below -20. Thus, an  
670 attractive hypothesis is that variations in F-box proteins allow or enhance the ability of SCF complex  
671 to ubiquitinate microbial and/or host proteins required for the replication of the pathogen, thus  
672 contributing to stronger immune defence. In addition to antiviral immunity, we also expect certain

673 alleles of F-box genes to confer other fitness advantages, given the importance of ubiquitination-  
674 proteasome system in many biological processes.

### 675 **Intraspecific adaptive evolution of csGPCRs**

676 The csGPCR family is the largest gene family in *C. elegans* and contains over 1,300 genes.  
677 Through the studies of specific phenotypes, a few csGPCRs were previously connected to  
678 adaptation. For example, the deletion of two csGPCR genes, *srg-36* and *srg-37*, which resulted in  
679 insensitivity to the dauer pheromone ascaroside and defects in entering dauer diapause, were  
680 acquired independently by two domesticated *C. elegans* strains grown in high density (McGrath,  
681 et al. 2011). Similar loss-of-function deletions in *srg-36* and *srg-37* were also found in natural  
682 isolates across the globe, suggesting that niche-associated variation in pheromone receptors may  
683 contribute to the boom-and-bust population dynamics (Lee, et al. 2019). In addition, a frameshift-  
684 causing deletion in another csGPCR, *str-217*, in Hawaiian strain CB4856, led to resistance to the  
685 insect repellents N,N-Diethyl-meta-toluamide (DEET) (Dennis, et al. 2018) and similar deletions  
686 were found in nine other wild isotypes (our unpublished results), suggesting that *C. elegans* may  
687 have evolved to acquire resistance to harmful environmental chemicals by inactivating csGPCRs.  
688 The above examples showcased how the intraspecific evolution of individual csGPCR genes can  
689 have significant functional consequences and contribute to adaptation. Our study, in a more  
690 systematic way, indicates that csGPCRs are highly diverse and are under strong positive selection  
691 in the *C. elegans* wild population.

692 Among the four csGPCR superfamilies (*Str*, *Sra*, *Srg*, and *Solo*), our analysis using  
693 nonsynonymous SNVs found that *Str* genes had larger polymorphism and stronger positive  
694 selection than *Sra* and *Srg* genes (fig. 1F and 5D), which is consistent with previous observation on  
695 the intraspecific variations of *Str* genes (Stewart, et al. 2005). In fact, these variations created ~200  
696 pseudogenes *Str* genes in *C. elegans* reference genome (the N2 strain) through often times only  
697 one apparent defect. Compared to *Str* genes, we found that *Solo* superfamily csGPCRs, especially  
698 *Srw* genes have even larger diversity and stronger positive selection. Given that *Srw* genes are the  
699 only csGPCRs that have clear homology with vertebrate GPCRs and likely code for  
700 FMRamide/peptide receptors (Robertson and Thomas 2006), large variations in these genes

701 might reflect the need to detect a wide range of environmental peptides. Moreover, most of the  
702 high frequency derived sites of *srw* genes in non-Hawaiian population are mapped to the regions  
703 that code for the extracellular domains, suggesting that altered ligand recognition might be  
704 positively selected. A similar observation was made for *Srz* genes in the *Solo* superfamily based on  
705 that *dN/dS* ratios among paralogous groups of *Srz* genes in *C. elegans* and *C. briggsae* peak in the  
706 extracellular loops (Thomas, et al. 2005). Thus, the large gene pool of csGPCRs may facilitate the  
707 adaptation to a changing environment by supplying alleles with specific ligand binding properties  
708 for positive selection.

### 709 **The correlation between large diversity and strong positive selection**

710           Compared to other gene families, F-box and csGPCR genes not only have large genetic  
711 diversity but also show strong signs of positive selection. This correlation is counterintuitive,  
712 because selection tends to reduce variation. We reason that gene families such as the TFs and  
713 protein kinases have low polymorphism because they play critical roles in the development of *C.*  
714 *elegans* and thus may be under purifying selection. In comparison, F-box and csGPCR genes  
715 maintain large polymorphism likely due to the lack of strong purifying selection, as well as high  
716 recombination rate and frequent gene flow. High recombination rate results from their clustering  
717 in the chromosomal arms, and gene flow between genetically divergent subpopulations helps  
718 maintain genetic diversity.

719           Rapid expansion of the F-box and csGPCR gene families and high rate of gene gain and  
720 loss also contributed to their large diversity and facilitated positive selection and adaptation.  
721 Indeed, our analysis of copy number variants found more frequent gene duplication and deletion  
722 in F-box and csGPCR genes than genomic average, supporting fast intraspecific evolution of these  
723 genes. Previous studies found that the *C. elegans* genome shows a higher duplication rate than  
724 *Drosophila* and *yeast* genomes (Lipinski, et al. 2011). This pattern is mostly likely driven by the  
725 duplication of F-box and csGPCR genes. Functional diversification of the duplicated genes could  
726 lead to novel functional characteristics. Although the function of most F-box and csGPCR genes in  
727 *C. elegans* are unknown, their expression pattern, to certain extent, reflects their potential  
728 functions. For example, among the 39 positively selected ( $H < -20$ ) csGPCRs whose expression were

729 studied before (Vidal, et al. 2018), we found that these csGPCRs show distinct expression patterns  
730 in a diverse range of tissues ([supplementary fig. S14, Supplementary Material online](#)). Although  
731 expression is heavily enriched in sensory neurons, most csGPCRs are expressed in unique sets of  
732 cells and identical expression patterns for two csGPCRs are rare. We suspect the diversification in  
733 expression regulation is correlated with diversification in functions. Thus, our data supports a  
734 model that duplications of F-box and csGPCR genes and accumulation of nonsynonymous SNVs  
735 lead to functional diversities in protein degradation and chemosensation pathways, which allowed  
736 positive selection to act upon during adaptation.

737

### 738 **Acknowledgments**

739 We thank the *Caenorhabditis elegans* Natural Diversity Resource (CeNDR) at Northwestern  
740 University for sharing genomic data of the *C. elegans* wild isolates through their website. This study  
741 is supported by funds from the Research Grant Council of Hong Kong [ECS 27104219], the Food  
742 and Health Bureau of Hong Kong [HMRF 07183186], and seed funds from the University of Hong  
743 Kong [201812159005 and 201910159087] to C.Z. Computational work were performed using  
744 research computing facilities offered by Information Technology Services at the University of Hong  
745 Kong.

746

### 747 **References**

748 Correction: A Randomised, Double-Blind, Controlled Efficacy Trial of the LiESP/QA-21 Vaccine in Naive  
749 Dogs Exposed to Two *Leishmania infantum* Transmission Seasons. *PLoS Negl Trop Dis* 8:e3408.  
750 Andersen EC, Gerke JP, Shapiro JA, Crissman JR, Ghosh R, Bloom JS, Felix MA, Kruglyak L. 2012.  
751 Chromosome-scale selective sweeps shape *Caenorhabditis elegans* genomic diversity. *Nat Genet*  
752 44:285-290.  
753 Angeles-Albores D, Lee RYN, Chan J, Sternberg PW. 2018. Two new functions in the WormBase  
754 Enrichment Suite. *Micropublication: biology. Dataset*.  
755 Bakowski MA, Desjardins CA, Smelkinson MG, Dunbar TL, Lopez-Moyado IF, Rifkin SA, Cuomo CA,  
756 Troemel ER. 2014. Ubiquitin-mediated response to microsporidia and virus infection in *C. elegans*. *PLoS*  
757 *Pathog* 10:e1004200.  
758 Begun DJ, Aquadro CF. 1992. Levels of naturally occurring DNA polymorphism correlate with  
759 recombination rates in *D. melanogaster*. *Nature* 356:519-520.  
760 Bounoutas A, Zheng Q, Nonet ML, Chalfie M. 2009. mec-15 encodes an F-box protein required for touch  
761 receptor neuron mechanosensation, synapse formation and development. *Genetics* 183:607-617,



762 601SI-604SI.

763 Bradbury PJ, Zhang Z, Kroon DE, Casstevens TM, Ramdoss Y, Buckler ES. 2007. TASSEL: software for  
764 association mapping of complex traits in diverse samples. *Bioinformatics* 23:2633-2635.

765 Browning SR, Browning BL. 2007. Rapid and accurate haplotype phasing and missing-data inference for  
766 whole-genome association studies by use of localized haplotype clustering. *Am J Hum Genet* 81:1084-  
767 1097.

768 Catchen J, Hohenlohe PA, Bassham S, Amores A, Cresko WA. 2013. Stacks: an analysis tool set for  
769 population genomics. *Molecular Ecology* 22:3124-3140.

770 Chen K, Franz CJ, Jiang H, Jiang Y, Wang D. 2017. An evolutionarily conserved transcriptional response  
771 to viral infection in *Caenorhabditis* nematodes. *BMC Genomics* 18:303.

772 Chen X, Schulz-Trieglaff O, Shaw R, Barnes B, Schlesinger F, Kallberg M, Cox AJ, Kruglyak S, Saunders CT.  
773 2016. Manta: rapid detection of structural variants and indels for germline and cancer sequencing  
774 applications. *Bioinformatics* 32:1220-1222.

775 Choi Y, Chan AP. 2015. PROVEAN web server: a tool to predict the functional effect of amino acid  
776 substitutions and indels. *Bioinformatics* 31:2745-2747.

777 Cook DE, Zdraljevic S, Roberts JP, Andersen EC. 2017. CeNDR, the *Caenorhabditis elegans* natural  
778 diversity resource. *Nucleic Acids Res* 45:D650-D657.

779 Crombie TA, Zdraljevic S, Cook DE, Tanny RE, Brady SC, Wang Y, Evans KS, Hahnel S, Lee D, Rodriguez BC,  
780 et al. 2019. Deep sampling of Hawaiian *Caenorhabditis elegans* reveals high genetic diversity and  
781 admixture with global populations. *Elife* 8.

782 Danecek P, Auton A, Abecasis G, Albers CA, Banks E, DePristo MA, Handsaker RE, Lunter G, Marth GT,  
783 Sherry ST, et al. 2011. The variant call format and VCFtools. *Bioinformatics* 27:2156-2158.

784 Dennis EJ, Dobosiewicz M, Jin X, Duvall LB, Hartman PS, Bargmann CI, Vosshall LB. 2018. A natural  
785 variant and engineered mutation in a GPCR promote DEET resistance in *C. elegans*. *Nature* 562:119-123.

786 Ewing G, Hermisson J. 2010. MSMS: a coalescent simulation program including recombination,  
787 demographic structure and selection at a single locus. *Bioinformatics* 26:2064-2065.

788 Fay JC, Wu CI. 2000. Hitchhiking under positive Darwinian selection. *Genetics* 155:1405-1413.

789 Fielenbach N, Guardavaccaro D, Neubert K, Chan T, Li D, Feng Q, Hutter H, Pagano M, Antebi A. 2007.  
790 DRE-1: an evolutionarily conserved F box protein that regulates *C. elegans* developmental age. *Dev Cell*  
791 12:443-455.

792 Francis RM. 2017. pophelper: an R package and web app to analyse and visualize population structure.  
793 *Mol Ecol Resour* 17:27-32.

794 Gao F, Ming C, Hu W, Li H. 2016. New Software for the Fast Estimation of Population Recombination  
795 Rates (FastEP RR) in the Genomic Era. *G3 (Bethesda)* 6:1563-1571.

796 Gautier M, Vitalis R. 2012. rehh: an R package to detect footprints of selection in genome-wide SNP  
797 data from haplotype structure. *Bioinformatics* 28:1176-1177.

798 Ghazi A, Henis-Korenblit S, Kenyon C. 2007. Regulation of *Caenorhabditis elegans* lifespan by a  
799 proteasomal E3 ligase complex. *Proc Natl Acad Sci U S A* 104:5947-5952.

800 Guo Y, Lang S, Ellis RE. 2009. Independent recruitment of F box genes to regulate hermaphrodite  
801 development during nematode evolution. *Curr Biol* 19:1853-1860.

802 Hudson RR, Slatkin M, Maddison WP. 1992. Estimation of levels of gene flow from DNA sequence data.  
803 *Genetics* 132:583-589.



- 804 Huson DH, Bryant D. 2006. Application of phylogenetic networks in evolutionary studies. *Molecular*  
805 *Biology and Evolution* 23:254-267.
- 806 Hutter S, Vilella AJ, Rozas J. 2006. Genome-wide DNA polymorphism analyses using VariScan. *Bmc*  
807 *Bioinformatics* 7:409.
- 808 Jager S, Schwartz HT, Horvitz HR, Conradt B. 2004. The *Caenorhabditis elegans* F-box protein SEL-10  
809 promotes female development and may target FEM-1 and FEM-3 for degradation by the proteasome.  
810 *Proc Natl Acad Sci U S A* 101:12549-12554.
- 811 Kim K, Sato K, Shibuya M, Zeiger DM, Butcher RA, Ragains JR, Clardy J, Touhara K, Sengupta P. 2009. Two  
812 chemoreceptors mediate developmental effects of dauer pheromone in *C. elegans*. *Science* 326:994-  
813 998.
- 814 Kipreos ET, Pagano M. 2000. The F-box protein family. *Genome Biol* 1:REVIEWS3002.
- 815 Krishnan A, Almen MS, Fredriksson R, Schioth HB. 2014. Insights into the origin of nematode  
816 chemosensory GPCRs: putative orthologs of the *Srw* family are found across several phyla of  
817 protostomes. *PLoS One* 9:e93048.
- 818 Kumar S, Stecher G, Li M, Knyaz C, Tamura K. 2018. MEGA X: Molecular Evolutionary Genetics Analysis  
819 across Computing Platforms. *Mol Biol Evol* 35:1547-1549.
- 820 Lee D, Zdraljevic S, Cook DE, Frezal L, Hsu JC, Sterken MG, Riksen JAG, Wang J, Kammenga JE, Braendle  
821 C, et al. 2019. Selection and gene flow shape niche-associated variation in pheromone response. *Nat*  
822 *Ecol Evol* 3:1455-1463.
- 823 Li Y, Stocks M, Hemmila S, Kallman T, Zhu H, Zhou Y, Chen J, Liu J, Lascoux M. 2010. Demographic histories  
824 of four spruce (*Picea*) species of the Qinghai-Tibetan Plateau and neighboring areas inferred from  
825 multiple nuclear loci. *Mol Biol Evol* 27:1001-1014.
- 826 Librado P, Rozas J. 2009. DnaSP v5: a software for comprehensive analysis of DNA polymorphism data.  
827 *Bioinformatics* 25:1451-1452.
- 828 Lipinski KJ, Farslow JC, Fitzpatrick KA, Lynch M, Katju V, Bergthorsson U. 2011. High spontaneous rate of  
829 gene duplication in *Caenorhabditis elegans*. *Curr Biol* 21:306-310.
- 830 Manning G. 2005. Genomic overview of protein kinases. *WormBook*:1-19.
- 831 McGaugh SE, Heil CS, Manzano-Winkler B, Loewe L, Goldstein S, Himmel TL, Noor MA. 2012.  
832 Recombination modulates how selection affects linked sites in *Drosophila*. *PLoS Biol* 10:e1001422.
- 833 McGrath PT, Xu Y, Ailion M, Garrison JL, Butcher RA, Bargmann CI. 2011. Parallel evolution of  
834 domesticated *Caenorhabditis* species targets pheromone receptor genes. *Nature* 477:321-325.
- 835 Mohd-Assaad N, McDonald BA, Croll D. 2018. Genome-Wide Detection of Genes Under Positive  
836 Selection in Worldwide Populations of the Barley Scald Pathogen. *Genome Biol Evol* 10:1315-1332.
- 837 Nayak S, Goree J, Schedl T. 2005. *fog-2* and the evolution of self-fertile hermaphroditism in  
838 *Caenorhabditis*. *PLoS Biol* 3:e6.
- 839 NEI M. 1987. *Molecular Evolutionary Genetics*. Columbia Univ. Press, New York.
- 840 Nielsen R, Williamson S, Kim Y, Hubisz MJ, Clark AG, Bustamante C. 2005. Genomic scans for selective  
841 sweeps using SNP data. *Genome Research* 15:1566-1575.
- 842 Park D, O'Doherty I, Somvanshi RK, Bethke A, Schroeder FC, Kumar U, Riddle DL. 2012. Interaction of  
843 structure-specific and promiscuous G-protein-coupled receptors mediates small-molecule signaling in  
844 *Caenorhabditis elegans*. *Proc Natl Acad Sci U S A* 109:9917-9922.
- 845 Pauli F, Liu Y, Kim YA, Chen PJ, Kim SK. 2006. Chromosomal clustering and GATA transcriptional regulation

846 of intestine-expressed genes in *C. elegans*. *Development* 133:287-295.

847 Pavlidis P, Zivkovic D, Stamatakis A, Alachiotis N. 2013. SweeD: likelihood-based detection of selective  
848 sweeps in thousands of genomes. *Molecular Biology and Evolution* 30:2224-2234.

849 Pfeifer B, Wittelsburger U, Ramos-Onsins SE, Lercher MJ. 2014. PopGenome: an efficient Swiss army  
850 knife for population genomic analyses in R. *Molecular Biology and Evolution* 31:1929-1936.

851 Pickrell JK, Pritchard JK. 2012. Inference of population splits and mixtures from genome-wide allele  
852 frequency data. *PLoS Genet* 8:e1002967.

853 Przeworski M. 2002. The signature of positive selection at randomly chosen loci. *Genetics* 160:1179-  
854 1189.

855 Purcell S, Neale B, Todd-Brown K, Thomas L, Ferreira MA, Bender D, Maller J, Sklar P, de Bakker PI, Daly  
856 MJ, et al. 2007. PLINK: a tool set for whole-genome association and population-based linkage analyses.  
857 *Am J Hum Genet* 81:559-575.

858 R.R. H. 1990. Gene genealogies and the coalescent process. *Oxford surveys in evolutionary biology*.

859 Reece-Hoyes JS, Deplancke B, Shingles J, Grove CA, Hope IA, Walhout AJ. 2005. A compendium of  
860 *Caenorhabditis elegans* regulatory transcription factors: a resource for mapping transcription regulatory  
861 networks. *Genome Biol* 6:R110.

862 Resch AM, Carmel L, Marino-Ramirez L, Ogurtsov AY, Shabalina SA, Rogozin IB, Koonin EV. 2007.  
863 Widespread positive selection in synonymous sites of mammalian genes. *Mol Biol Evol* 24:1821-1831.

864 Robertson HM. 2000. The large *srh* family of chemoreceptor genes in *Caenorhabditis nematodes* reveals  
865 processes of genome evolution involving large duplications and deletions and intron gains and losses.  
866 *Genome Res* 10:192-203.

867 Robertson HM, Thomas JH. 2006. The putative chemoreceptor families of *C. elegans*. *WormBook*:1-12.

868 Rozas J, Ferrer-Mata A, Sanchez-DelBarrio JC, Guirao-Rico S, Librado P, Ramos-Onsins SE, Sanchez-Gracia  
869 A. 2017. DnaSP 6: DNA Sequence Polymorphism Analysis of Large Data Sets. *Molecular Biology and*  
870 *Evolution* 34:3299-3302.

871 Sabeti PC, Reich DE, Higgins JM, Levine HZ, Richter DJ, Schaffner SF, Gabriel SB, Platko JV, Patterson NJ,  
872 McDonald GJ, et al. 2002. Detecting recent positive selection in the human genome from haplotype  
873 structure. *Nature* 419:832-837.

874 Seidel HS, Rockman MV, Kruglyak L. 2008. Widespread genetic incompatibility in *C. elegans* maintained  
875 by balancing selection. *Science* 319:589-594.

876 Sengupta P, Chou JH, Bargmann CI. 1996. *odr-10* encodes a seven transmembrane domain olfactory  
877 receptor required for responses to the odorant diacetyl. *Cell* 84:899-909.

878 Stadler T, Haubold B, Merino C, Stephan W, Pfaffelhuber P. 2009. The impact of sampling schemes on  
879 the site frequency spectrum in nonequilibrium subdivided populations. *Genetics* 182:205-216.

880 Stevens L, Felix MA, Beltran T, Braendle C, Caurcel C, Fausett S, Fitch D, Frezal L, Gosse C, Kaur T, et al.  
881 2019. Comparative genomics of 10 new *Caenorhabditis* species. *Evol Lett* 3:217-236.

882 Stewart MK, Clark NL, Merrihew G, Galloway EM, Thomas JH. 2005. High genetic diversity in the  
883 chemoreceptor superfamily of *Caenorhabditis elegans*. *Genetics* 169:1985-1996.

884 Tajima F. 1989. Statistical method for testing the neutral mutation hypothesis by DNA polymorphism.  
885 *Genetics* 123:585-595.

886 Thomas CG, Wang W, Jovelin R, Ghosh R, Lomasko T, Trinh Q, Kruglyak L, Stein LD, Cutter AD. 2015. Full-  
887 genome evolutionary histories of selfing, splitting, and selection in *Caenorhabditis*. *Genome Research*

888 25:667-678.

889 Thomas JH. 2006. Adaptive evolution in two large families of ubiquitin-ligase adapters in nematodes  
890 and plants. *Genome Research* 16:1017-1030.

891 Thomas JH, Kelley JL, Robertson HM, Ly K, Swanson WJ. 2005. Adaptive evolution in the SRZ  
892 chemoreceptor families of *Caenorhabditis elegans* and *Caenorhabditis briggsae*. *Proc Natl Acad Sci U S*  
893 *A* 102:4476-4481.

894 Thomas JH, Robertson HM. 2008. The *Caenorhabditis* chemoreceptor gene families. *BMC Biol* 6:42.

895 Vidal B, Aghayeva U, Sun H, Wang C, Glenwinkel L, Bayer EA, Hobert O. 2018. An atlas of *Caenorhabditis*  
896 *elegans* chemoreceptor expression. *PLoS Biol* 16:e2004218.

897 Von Stetina SE, Watson JD, Fox RM, Olszewski KL, Spencer WC, Roy PJ, Miller DM, 3rd. 2007. Cell-specific  
898 microarray profiling experiments reveal a comprehensive picture of gene expression in the *C. elegans*  
899 nervous system. *Genome Biol* 8:R135.

900 Wakeley J, Aliacar N. 2001. Gene genealogies in a metapopulation. *Genetics* 159:893-905.

901 Xu G, Ma H, Nei M, Kong H. 2009. Evolution of F-box genes in plants: different modes of sequence  
902 divergence and their relationships with functional diversification. *Proc Natl Acad Sci U S A* 106:835-840.

903

#### 904 **Figure legends**

905 **Figure 1. Large genetic polymorphism of csGPCR and F-box genes.** (A) Flowchart of the  
906 analysis of SNVs among the wild isolates of *C. elegans*. (B) Genes with large  $P_i$  for  
907 nonsynonymous SNVs tend to be enriched in csGPCR and F-box gene families.  $P_i$  values of  
908 individual genes can be found in Table S1. (C) A histogram for the distribution of  $P_i$  across all  
909 genes. (D) The cumulative distribution of the  $P_i$  values for all genes, csGPCR, F-box,  
910 transcription factor (TF) and Protein kinases genes. (E) The mean and median of  $P_i$  for different  
911 gene families. (F) The mean and median of  $P_i$  for different csGPCR superfamilies and families.  
912 The number of genes are in the parentheses. For statistical significance in a non-parametric  
913 Wilcoxon's rank-sum test, ns means not significant, a single asterisk means  $p < 0.05$ , and  
914 double asterisks mean  $p < 0.01$ . Similar annotations apply for the rest of the Figures.

915

916 **Figure 2. Phylogenetic relationship of the *C. elegans* wild isolates.** Neighbour-joining nets  
917 plotted using the nonsynonymous SNVs of all genes (A), F-box genes (B), csGPCRs (C), or *Srw*  
918 genes (D). *C. brenneri*, *C. remanei*, and *C. briggsae* were used as outgroups for tree  
919 construction. Three representative non-Hawaiian strains (in black) with high ancestral  
920 population fraction were chosen from each of the eight non-Hawaiian groups. Edges are

921 labelled with “100”, if 100% bootstrap support was attained in 1,000 bootstrap replicates. To  
922 fit the trees into one figure, some branches connecting the three outgroups and the root are  
923 manually shortened (dashed lines).

924

925 **Figure 3. csGPCR and F-box genes contribute to the large divergence of Hawaiian strains and**  
926 **the differentiation among non-Hawaiian subpopulations.** (A) The mean of  $P_i$  for  
927 nonsynonymous SNVs in all genes, csGPCRs, *Srw* genes, F-box genes, TF, and Protein kinase for  
928 non-Hawaiian and Hawaiian populations, as well as the three Hawaiian subpopulations. (B)  
929 The average number of segregating sites that belong to only Hawaiian or non-Hawaiian strains  
930 and the sites that are shared by Hawaiian and non-Hawaiian strains for the six gene families.  
931 The number is also normalized to the CDS length of individual genes. The number of non-  
932 singleton segregating sites are in the parentheses. (C-E) The cumulative distribution of  
933 Hudson’s  $F_{ST}$  values for different gene families between the non-Hawaiian and Hawaiian  
934 populations (C), among the eight non-Hawaiian subpopulations (D), and among the three  
935 Hawaiian subpopulations (E). (F) The average  $F_{ST}$  value of different gene families among non-  
936 Hawaiian and among Hawaiian subpopulations.

937

938 **Figure 4. High recombination rate may contribute to the large diversity of csGPCR and F-box**  
939 **genes.** (A) Genomic location of F-box, csGPCR, Protein kinase, and TF genes plotted using  
940 TBtools. (B) The mean of  $P_i$  values for the nonsynonymous SNVs in all genes, csGPCR, and F-  
941 box genes in the arm or center of chromosome (Chr) II, III, IV and V. Chromosomes were  
942 divided into three regions according to genomic coordinates: the left arm (one-fourth of the  
943 chromosome from the start), the center (the central half), and the right arm (one-fourth of  
944 the chromosome close to the end). The values in parentheses indicated gene numbers. (C)  
945 Recombination rates ( $Rho$ ) across Chr II, III and V in 50-kb windows. (D) The Pearson  
946 correlation between recombination rate and  $P_i$  for F-box genes on Chr III and csGPCR genes  
947 on Chr V.

948

949 **Figure 5. Positive selection on F-box and csGPCR gene.** (A) Enrichment of csGPCR and F-box  
950 genes among the genes with Tajima's  $D < -2$  and Fay and Wu's  $H < -20$ , respectively. Overlap  
951 set include genes that fits both criteria. (B) The mean and median of Tajima's  $D$  and Fay and  
952 Wu's  $H$  values of all genes, csGPCRs, F-box, TF, and Protein kinase. (C) The cumulative  
953 distribution of different gene families. (D) The mean and median of Fay and Wu's  $H$  values of  
954 genes in csGPCR superfamilies and *Solo* gene families. The number of genes are in parentheses.  
955 (E) The cumulative distribution of genes in csGPCR subfamilies and *Solo* families.  $H$  values were  
956 calculated using XZ1516 as the outgroup. The statistical significance was determined by  
957 Wilcoxon rank-sum test.

958

959 **Figure 6. Accumulation of high-frequency derived alleles in F-box and csGPCR genes in non-**  
960 **Hawaiian population.** (A) The average Fay and Wu's  $H$  values of all genes, csGPCRs, *Srw* genes,  
961 F-box genes, TFs, and Protein kinase for the non-Hawaiian and Hawaiian populations, as well  
962 as the three Hawaiian subpopulations. (B) The average number of high frequency (>50%)  
963 derived sites in genes from different gene families with XZ1516 as the outgroup. The right  
964 panel shows the Pearson correlation between Fay and Wu's  $H$  and number of high-frequency  
965 derived sites. (C) The average Fay and Wu's  $H$  value in non-Hawaiian population calculated  
966 using different strains as the outgroup. XZ1516 and ECA701 are distant from all other strains  
967 and may be considered to contain the most ancestral alleles. ECA396 and ECA742 are  
968 representative strains from "Hawaii\_1" and "Hawaii\_2" subpopulations. (D) The cumulative  
969 distribution of the  $H$  values of all genes, F-box, or csGPCR genes calculated using ECA396 or  
970 ECA742 as the outgroup.

971

972 **Figure 7. Different selective pressure on different domains of F-box and csGPCR proteins.** (A)  
973 Cumulative distribution of  $Pi$  and Fay and Wu's  $H$  for nonsynonymous SNVs in the F-box domain  
974 or putative substrate-binding domains of F-box proteins. (B) Distribution of  $Pi$  and  $H$  for SNVs  
975 in the transmembrane domain or extracellular or intracellular domains of csGPCRs. (C) The  
976 domain structure of an F-box protein encoded by *fbxb-49*. The F-box domain is in blue, and

977 the type 2 F-box associated (FBA\_2) domain, likely involved in binding substrate, is in cyan. (D)  
978 The domain structure of a csGPCR encoded by *srw-68*. The predicted transmembrane (TM)  
979 domain is in green. Extracellular loops (Out.) and intracellular (In.) tails are indicated. In both  
980 (A) and (B), the panels immediately below the domain structure indicate the position of high-  
981 frequency (>0.5) derived sites in non-Hawaiian populations using XZ1516 as the outgroup. Y-  
982 axis indicates the frequency of the derived alleles among the non-Hawaiian population (black  
983 dots) or the Hawaiian population (red dots). Each dot indicates a nonsynonymous SNVs. SNVs  
984 causing amino acid substitution with PROVEAN score below -2.5 were shown. The lower two  
985 panels showed the high-frequency derived sites in the non-Hawaiian population calculated  
986 using ECA396 ("Hawaii\_1" strain; purple dots) or ECA742 ("Hawaii\_2" strain; blue dots) as the  
987 outgroup.

988

989 **Figure 8. F-box and csGPCR genes are enriched in the genomic regions with selective**  
990 **footprint identified by extended haplotype homozygosity (EHH) analysis.** (A-C) Manhattan  
991 plots of the extent of haplotype homozygosity measured by the integrated Haplotype Score  
992 (iHS) within the non-Hawaiian population (A) and Hawaiian population (B). (C) Regions of  
993 selection in non-Hawaiian population but not the Hawaiian population indicated by the  
994 Manhattan plots of cross-population EHH (XPEHH). (D) The number of F-box and csGPCR genes  
995 that contain SNVs with significant iHS or XPEHH and their folds of enrichment. For extended  
996 regions, significant SNVs that are less than 50-kb apart were connected to generate regions  
997 with selective footprints. (E) The mean Fay and Wu's *H* values for all genes, F-box, and csGPCR  
998 genes in the arms and the center of chromosome (Chr) II, III, and V. (F) The domain structure  
999 of a representative F-box protein coded by *fbxa-85*; the F-box domain is in blue and the FTH  
1000 domain in cyan. (G) The domain structure of a representative csGPCR coded by *srw-56*; the  
1001 predicted transmembrane (TM) domain is in green, and extracellular loops (Out.) and  
1002 intracellular (In.) tails are also indicated. Among the sites whose XPEHH > 2 in the two genes,  
1003 the ones that are also high-frequency (> 0.5) derived sites with ECA396 (purple dots) and  
1004 ECA742 (blue dots) as the outgroup are shown.



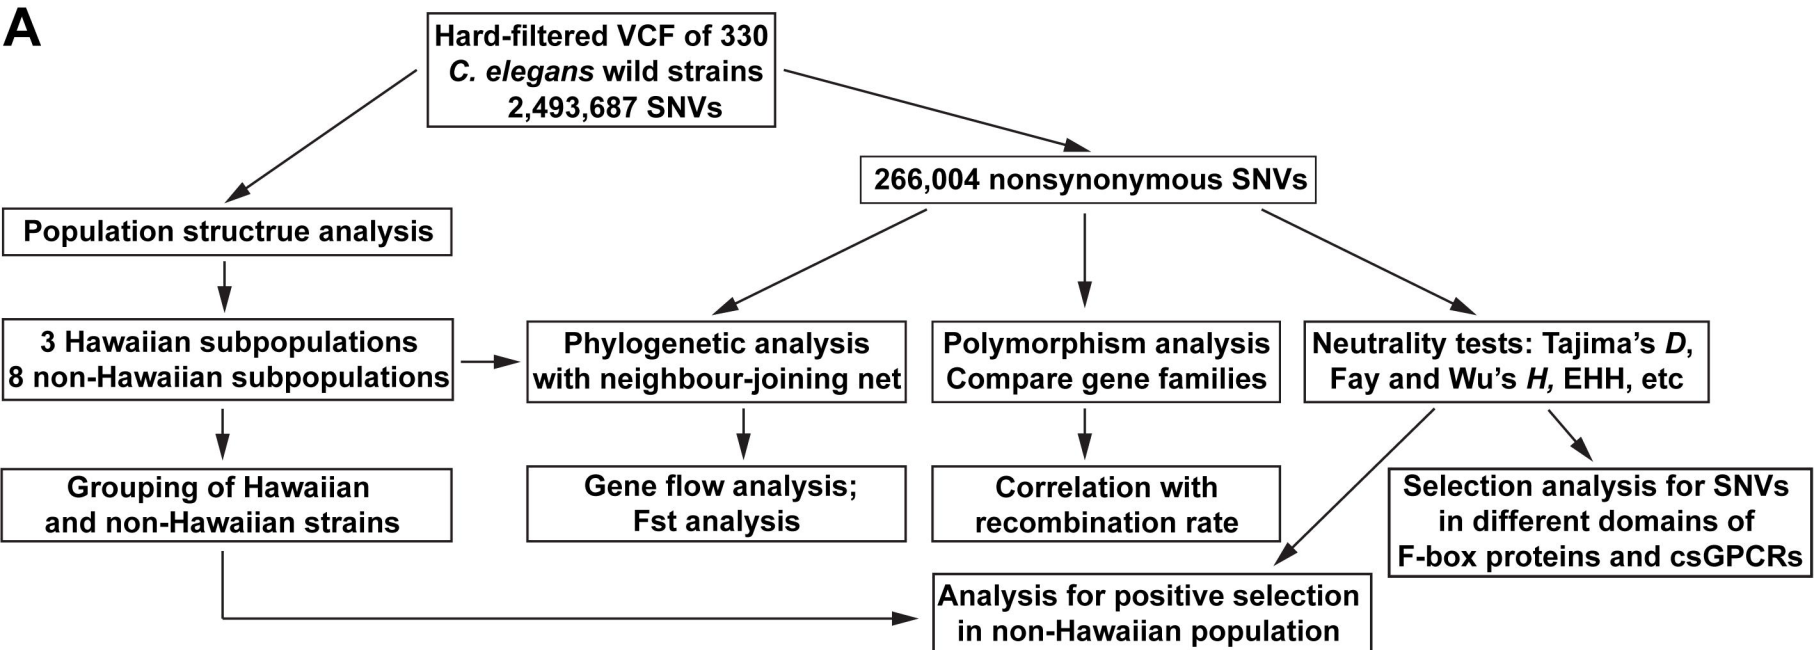

**B**

|             | Total # | <i>Pi</i> > 0.01 |                 | <i>Pi</i> > 0.005 |                 | <i>Pi</i> > 0.0025 |                 |
|-------------|---------|------------------|-----------------|-------------------|-----------------|--------------------|-----------------|
|             |         | Number           | Enrichment fold | Number            | Enrichment fold | Number             | Enrichment fold |
| csGPCRs     | 1301    | 20               | 1.23            | 102               | 1.99            | 265                | 2.27            |
| F-box genes | 336     | 46               | 10.95           | 86                | 6.49            | 148                | 4.91            |
| All genes   | 18797   | 235              |                 | 741               |                 | 1685               |                 |

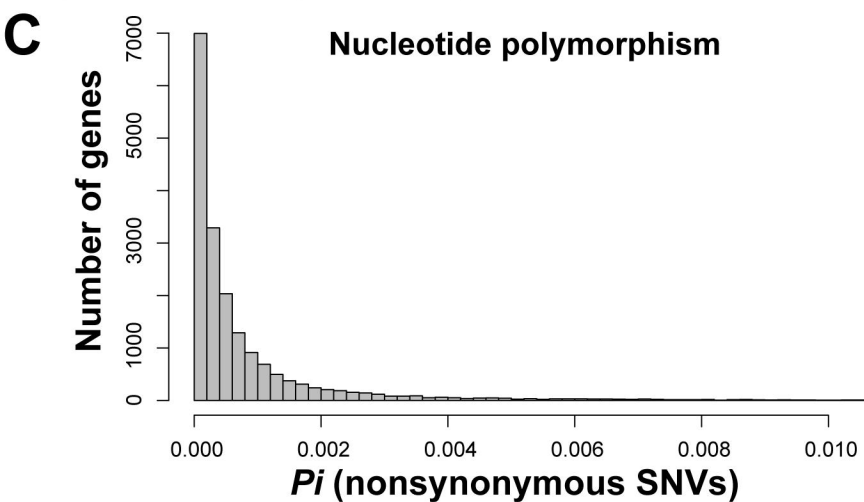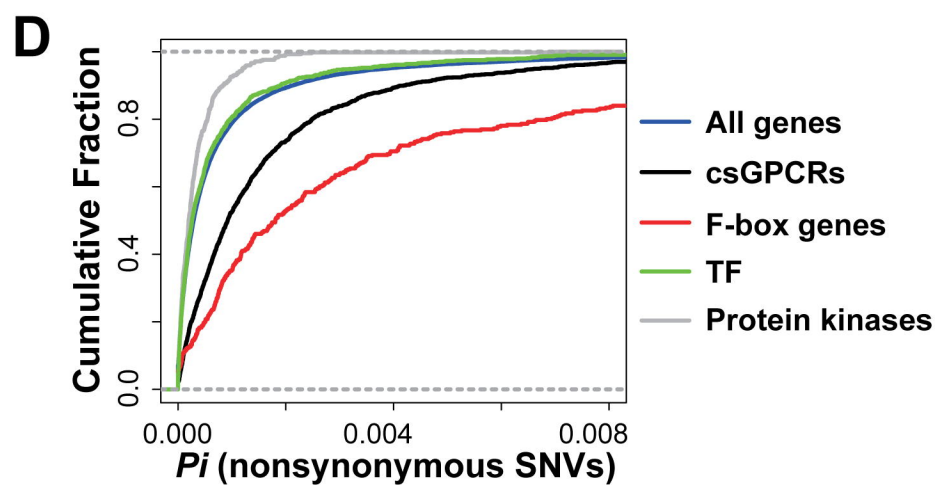

**E**

|                | <i>Pi</i> |         |
|----------------|-----------|---------|
|                | Mean      | Median  |
| All genes      | 0.00099   | 0.00033 |
| csGPCRs        | 0.00179   | 0.00095 |
| F-box genes    | 0.00424   | 0.00200 |
| TF             | 0.00078   | 0.00027 |
| Protein kinase | 0.00036   | 0.00021 |

\*\* \*\*

\*\* \*\*

\*\* \*\*

\*\* \*\*

**F**

| csGPCR group | <i>Pi</i> |         |
|--------------|-----------|---------|
|              | Mean      | Median  |
| Solo (293)   | 0.00260   | 0.00144 |
| Str (567)    | 0.00191   | 0.00116 |
| Sra (126)    | 0.00087   | 0.00062 |
| Srg (315)    | 0.00117   | 0.00056 |
| Srw (112)    | 0.00338   | 0.00189 |
| Srz (65)     | 0.00249   | 0.00181 |
| Srbc (69)    | 0.00283   | 0.00154 |
| Srsx (37)    | 0.00045   | 0.00039 |

\*\* \*\*

\*\* \*\*

\*\* \*\*

ns

ns

\*\*

**A****All genes**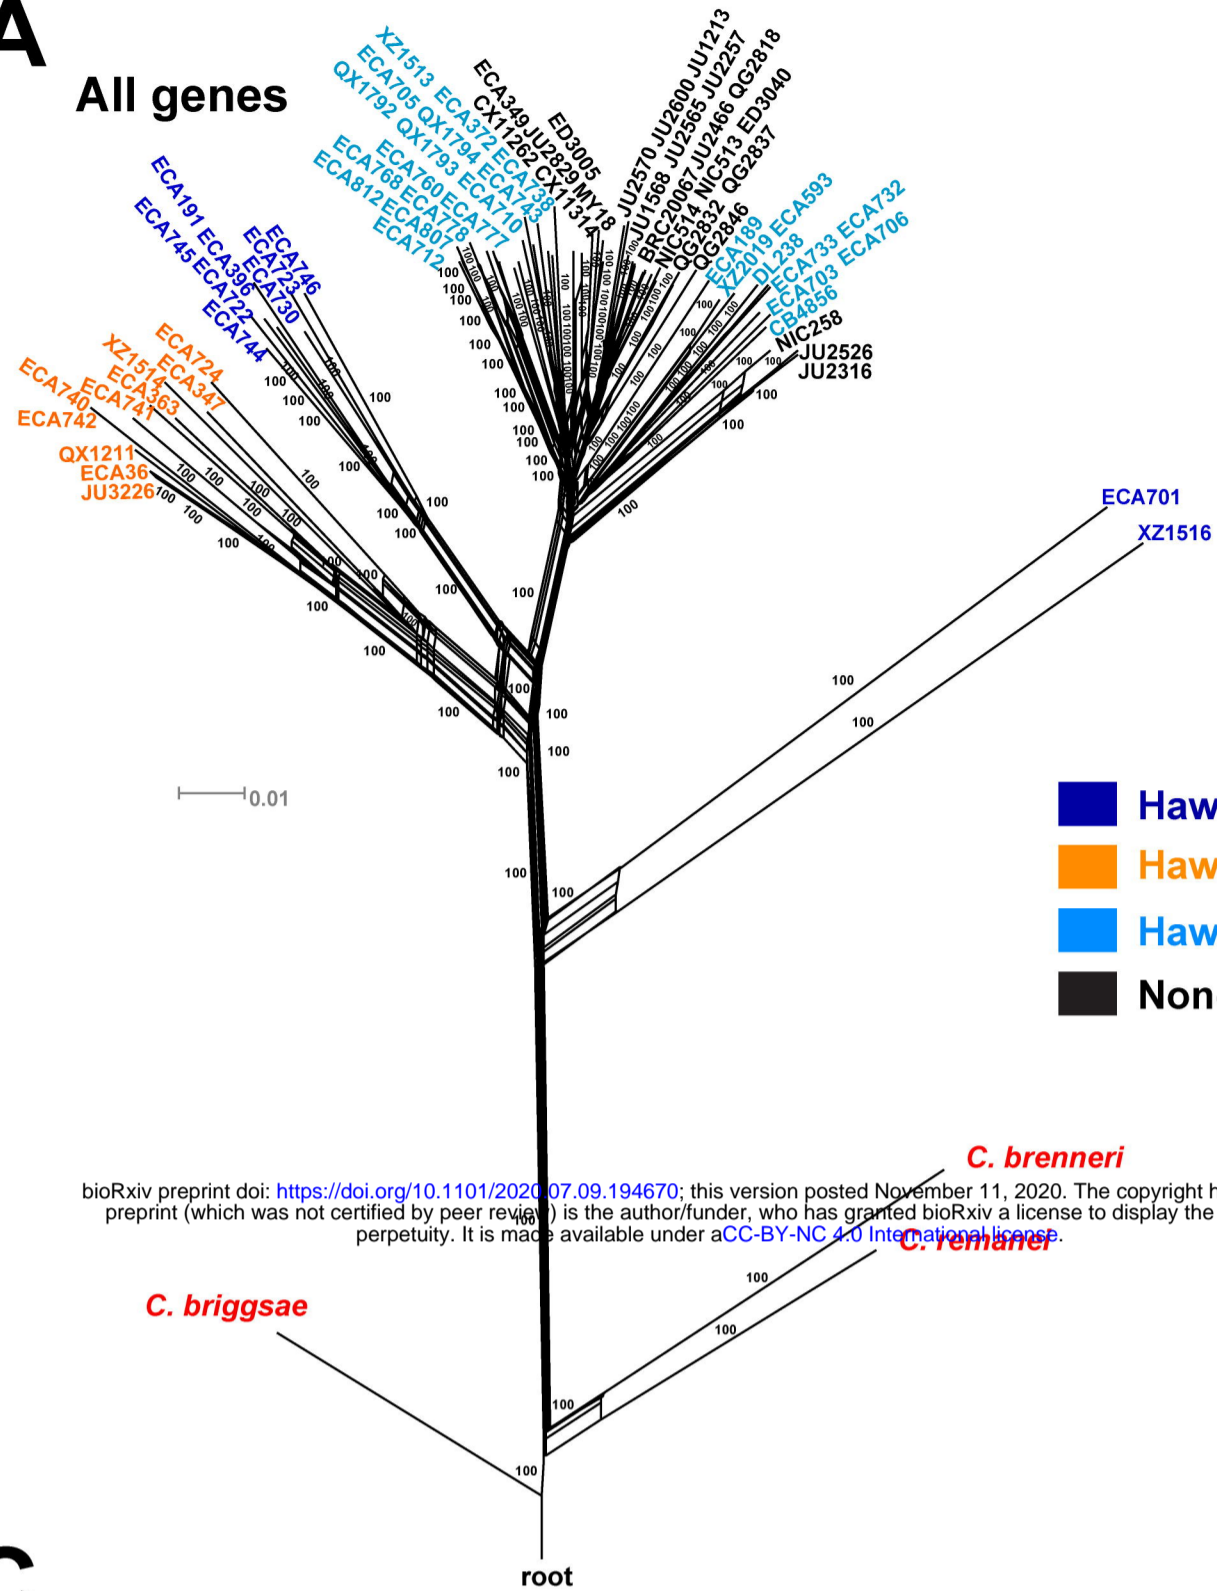**B****F-box genes**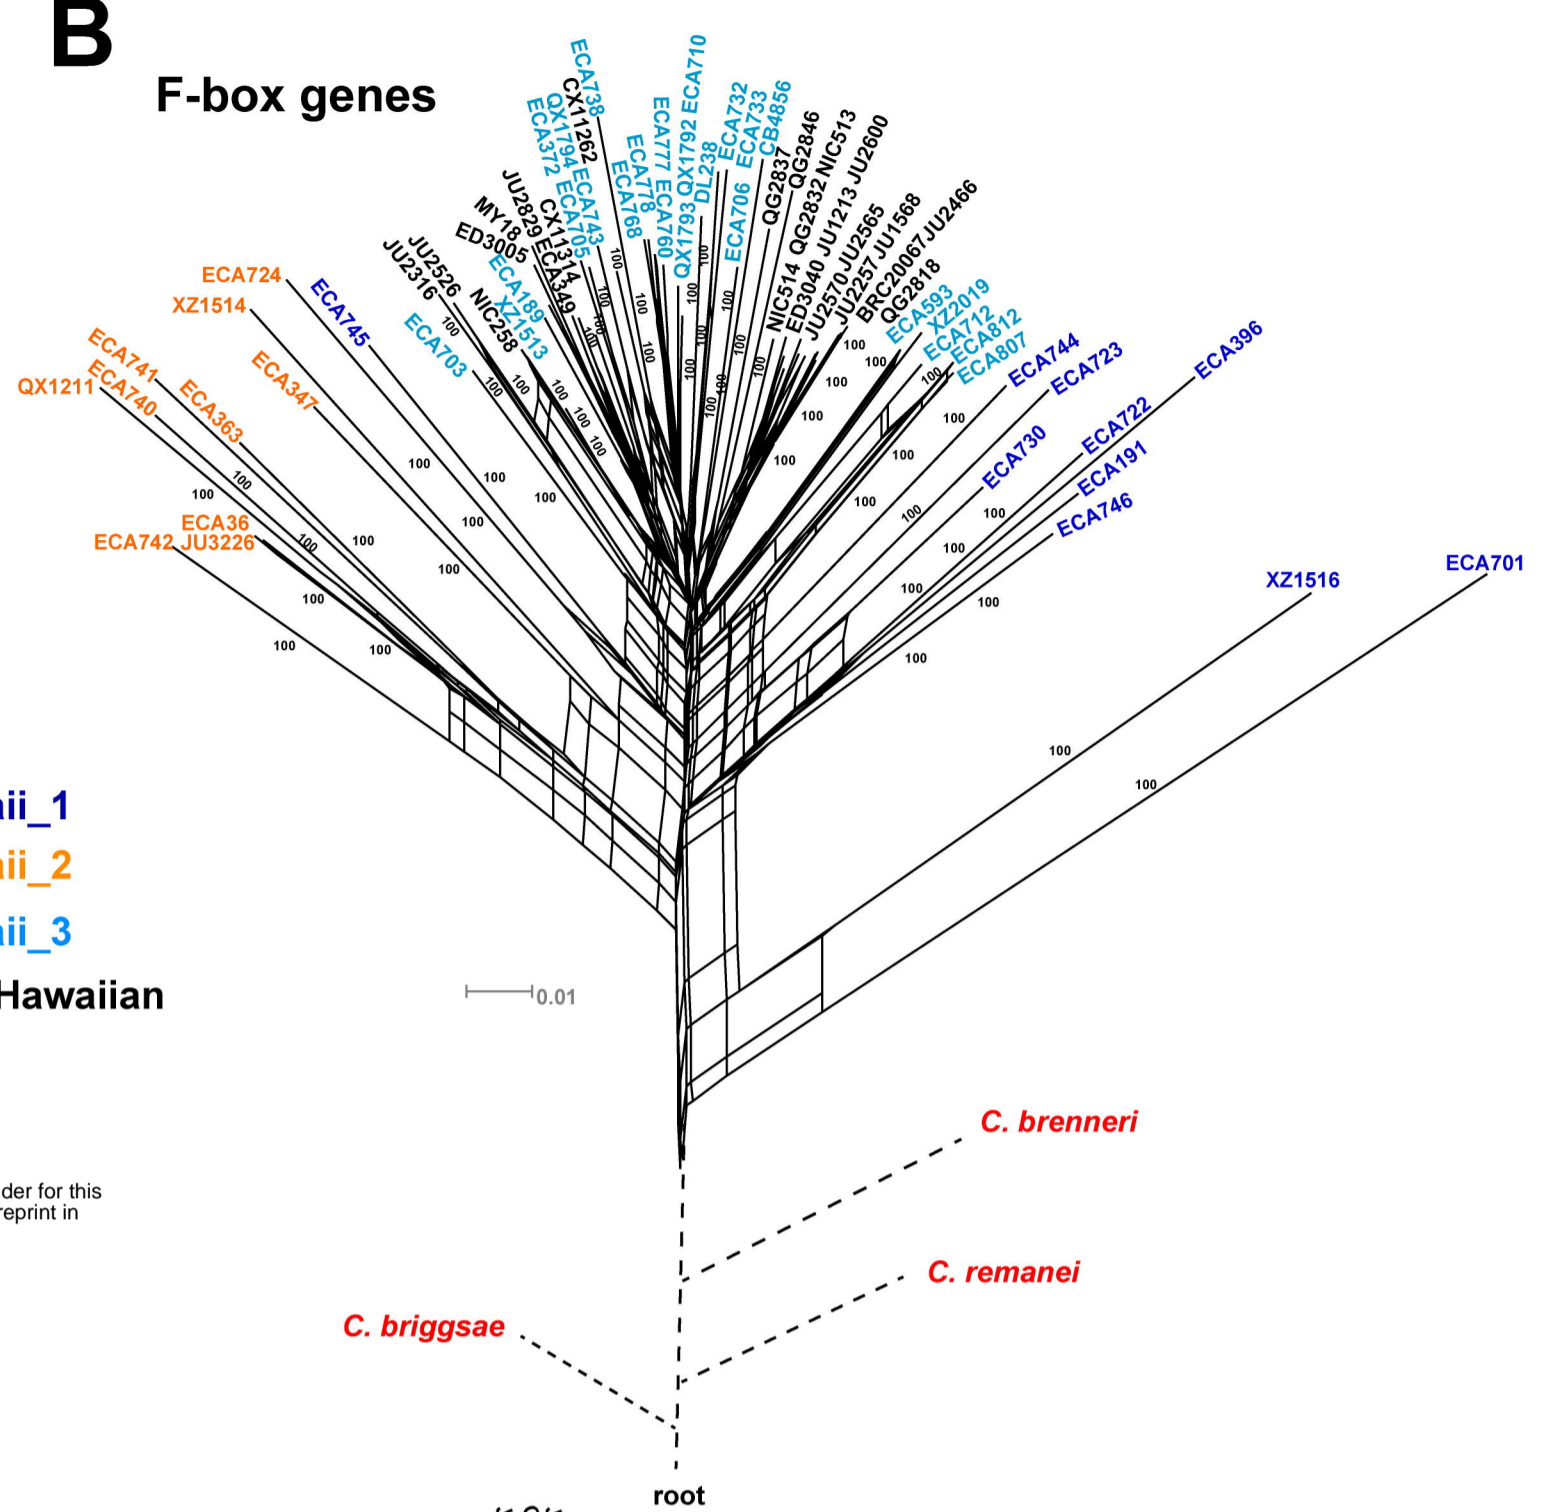**C****csGPCRs**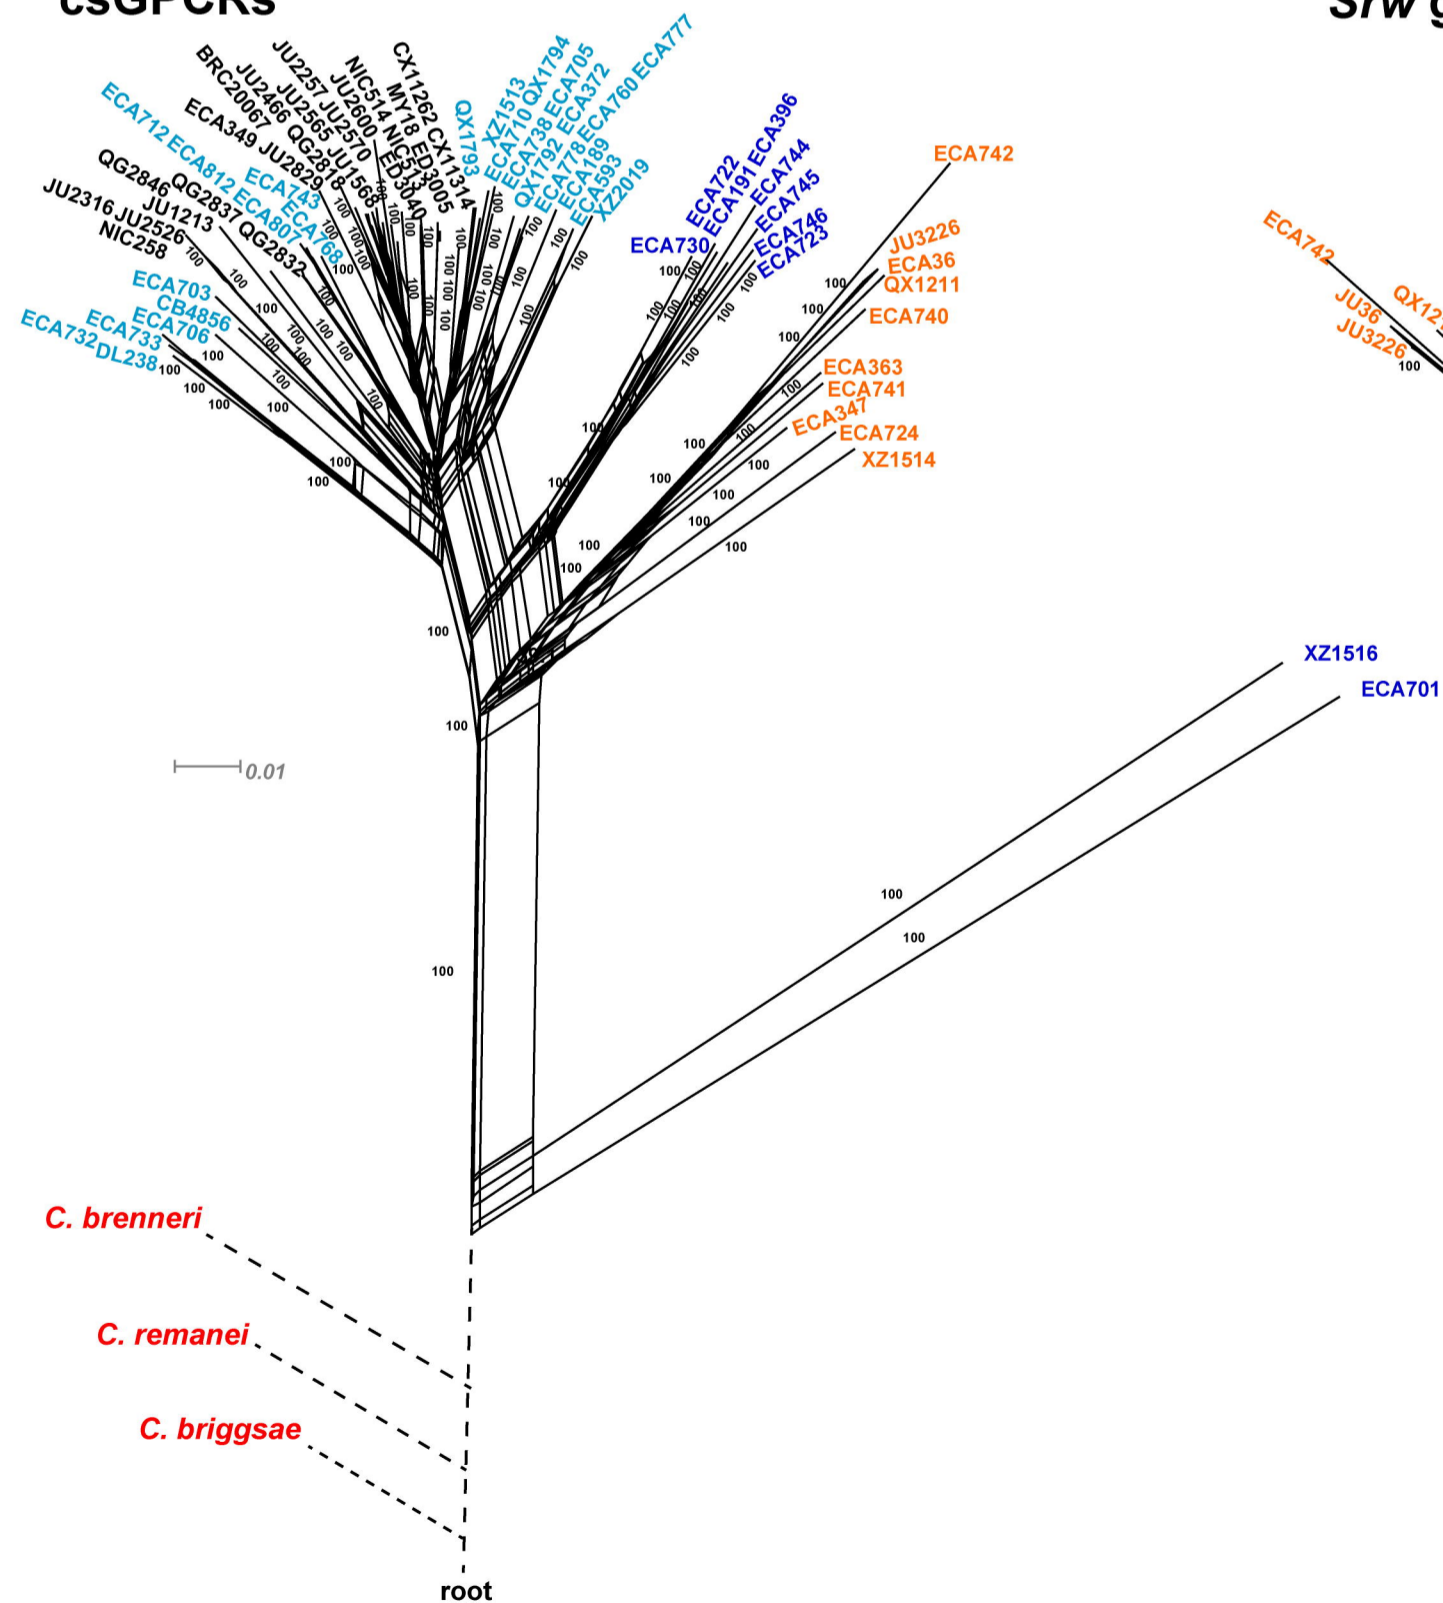**D****Srw genes**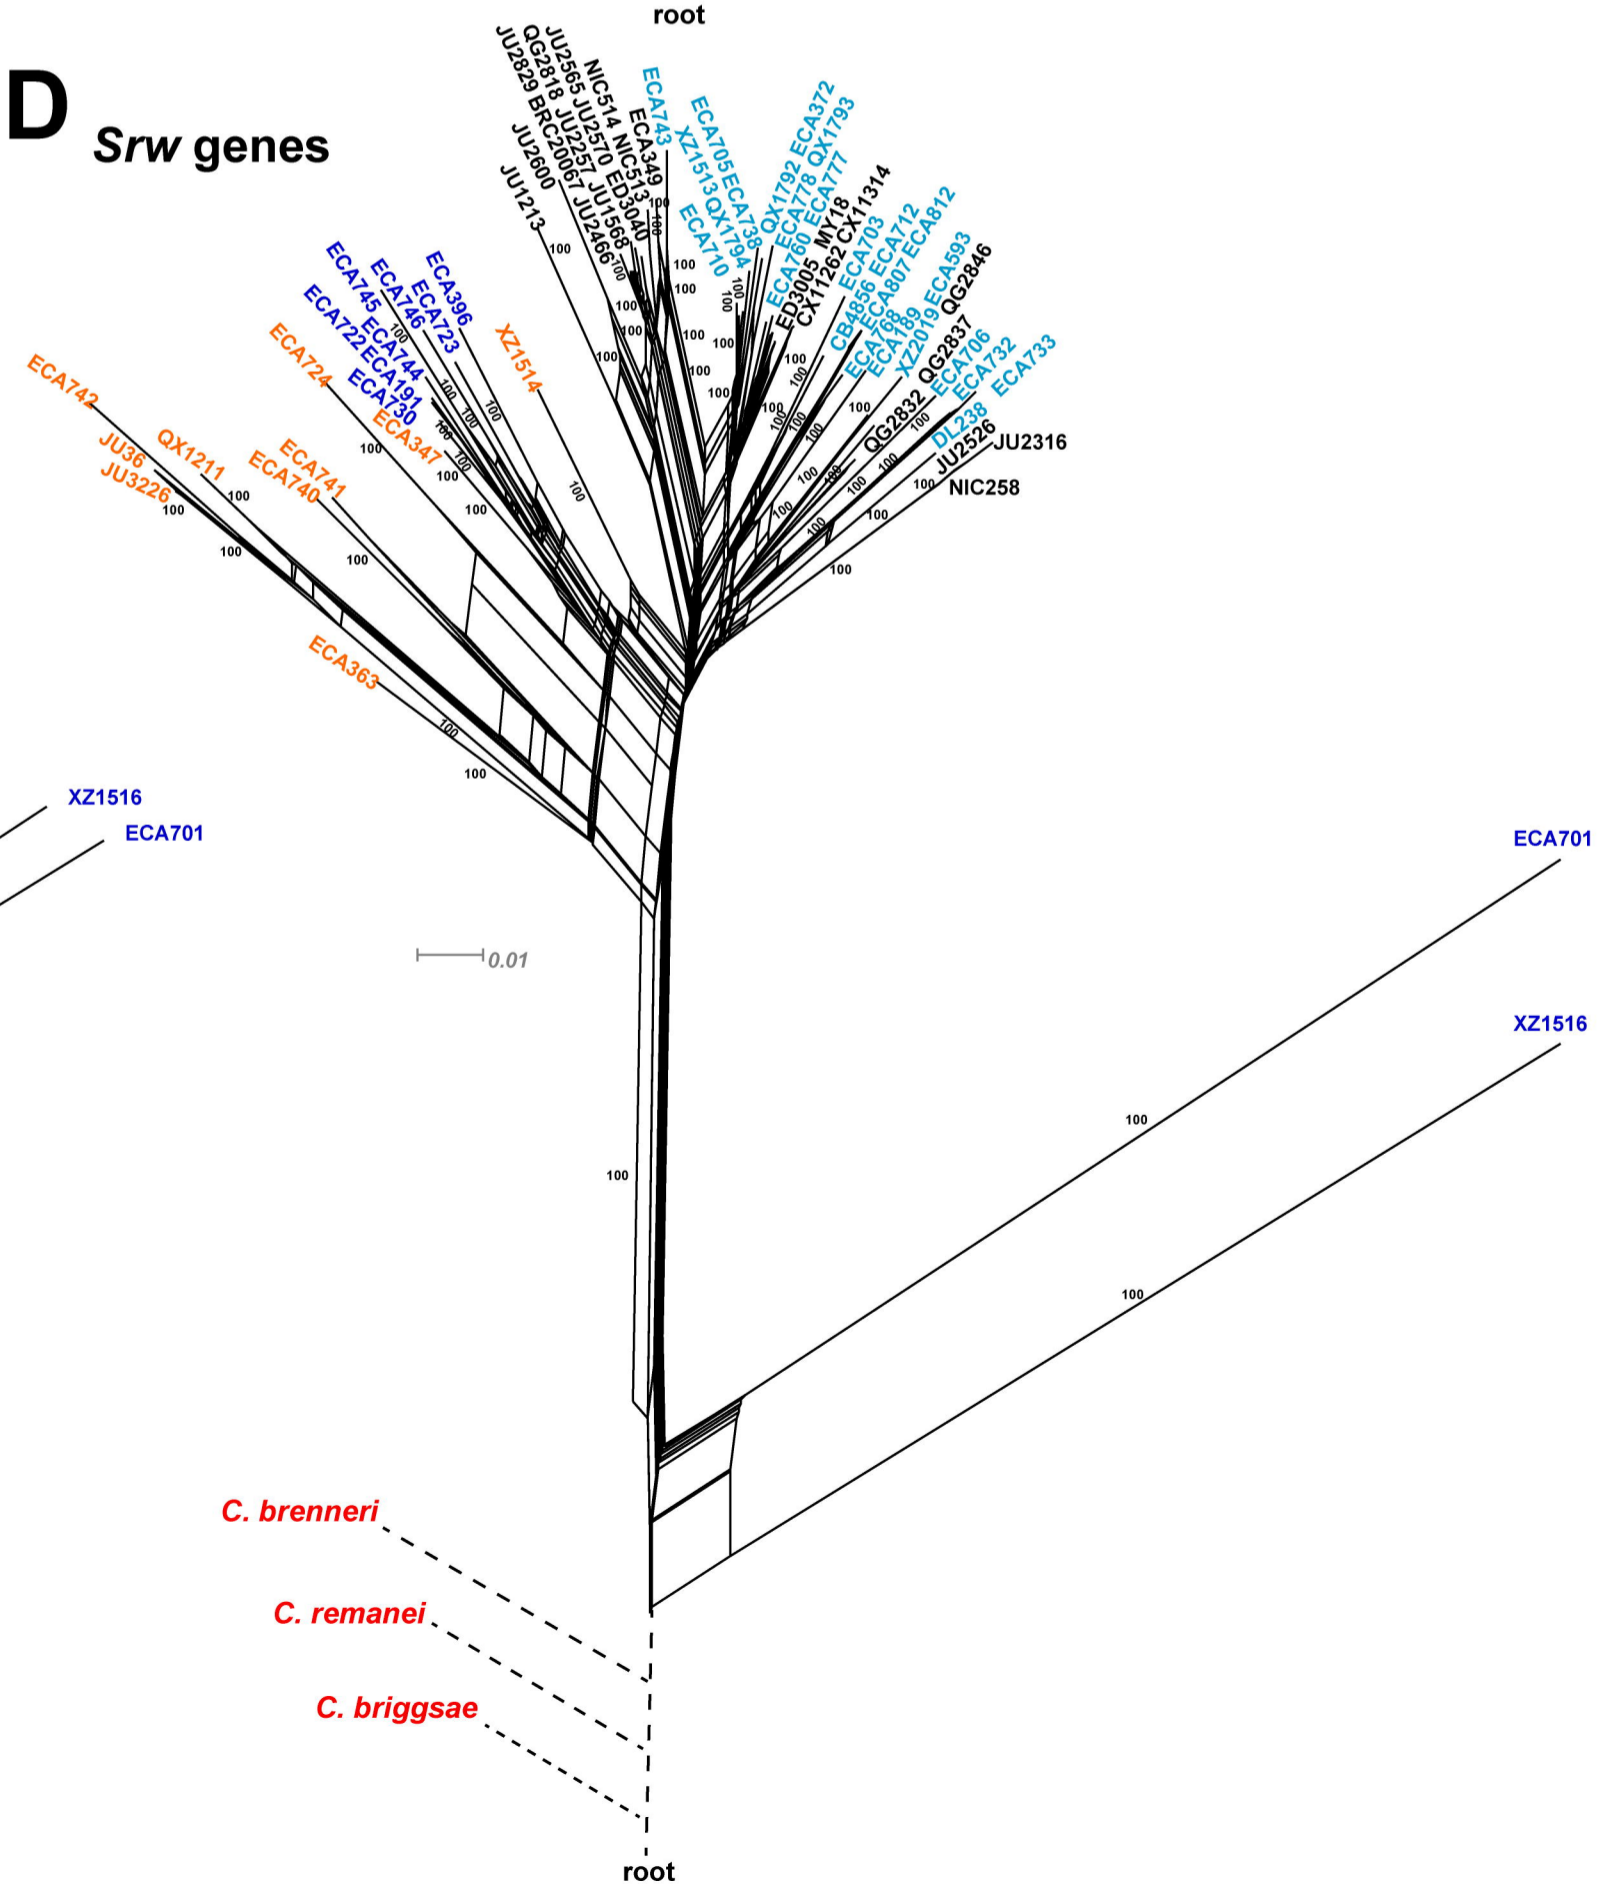



**A**

|                | All strains | Non-Hawaiian | Hawaiian | Hawaii_1 | Hawaii_2 | Hawaii_3 |
|----------------|-------------|--------------|----------|----------|----------|----------|
| All genes      | 0.0010      | 0.0007       | 0.0017   | 0.0017   | 0.0012   | 0.0010   |
| csGPCRs        | 0.0018      | 0.0013       | 0.0032   | 0.0035   | 0.0026   | 0.0019   |
| Srw GPCRs      | 0.0034      | 0.0026       | 0.0059   | 0.0066   | 0.0052   | 0.0035   |
| F-box genes    | 0.0042      | 0.0033       | 0.0069   | 0.0077   | 0.0064   | 0.0046   |
| TF             | 0.0008      | 0.0005       | 0.0014   | 0.0014   | 0.0010   | 0.0009   |
| Protein kinase | 0.0004      | 0.0003       | 0.0007   | 0.0006   | 0.0004   | 0.0003   |

**B**

| Segregating sites (non-singletons) |                           |                |                               |                 |              |            |
|------------------------------------|---------------------------|----------------|-------------------------------|-----------------|--------------|------------|
|                                    | Exclusively Hawaiian site |                | Exclusively nonHawaiian sites |                 | Shared sites |            |
|                                    | Number                    | Normalized     | Number                        | Normalized      | Number       | Normalized |
| All genes                          | 6.3 (2.7)                 | 0.006 (0.0026) | 3.1 (1.3)                     | 0.0029 (0.0012) | 4.6          | 0.0045     |
| csGPCRs                            | 10.7 (4.4)                | 0.011 (0.0044) | 4.3 (1.8)                     | 0.0043 (0.0019) | 9.1          | 0.0092     |
| Srw genes                          | 18.5 (7.1)                | 0.017 (0.0067) | 6.3 (3.4)                     | 0.0060 (0.0033) | 19.5         | 0.0182     |
| F-box genes                        | 18.2 (7.4)                | 0.018 (0.0071) | 7.2 (3.5)                     | 0.0073 (0.0035) | 20.2         | 0.0204     |
| TFs                                | 6.4 (2.7)                 | 0.005 (0.0022) | 3.2 (1.3)                     | 0.0025 (0.0010) | 4.5          | 0.0037     |
| Protein kinase                     | 5.6 (2.5)                 | 0.003 (0.0014) | 3.9 (1.7)                     | 0.0020 (0.0008) | 2.6          | 0.0014     |

**C**

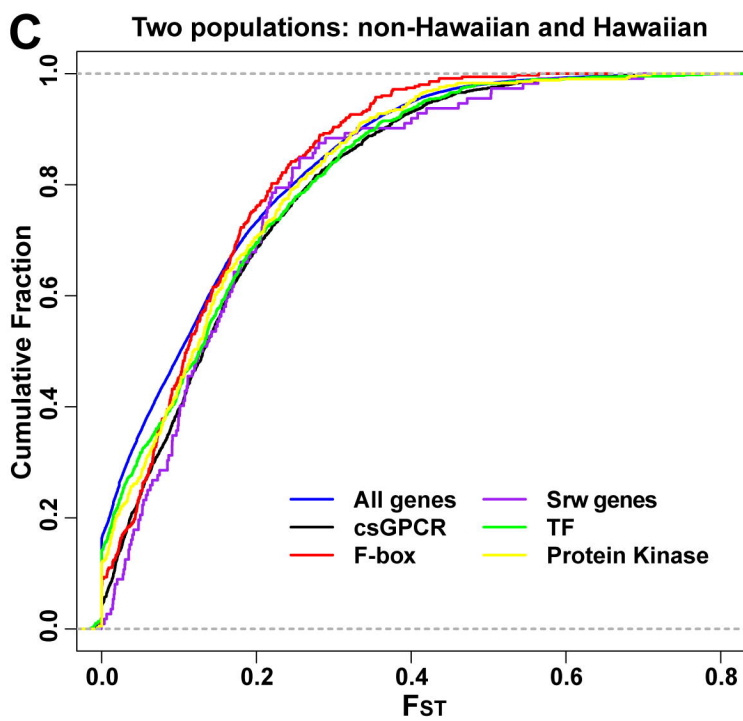

**D**

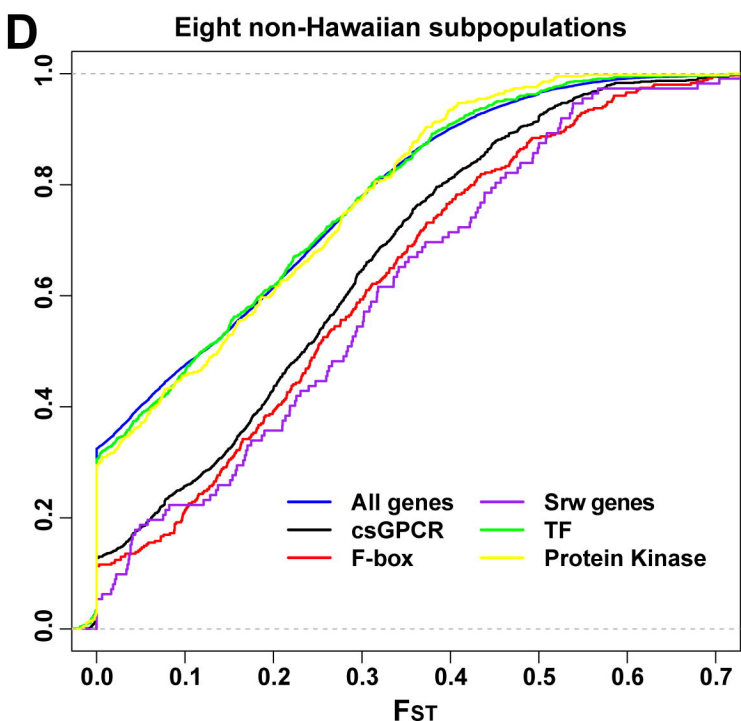

**E**

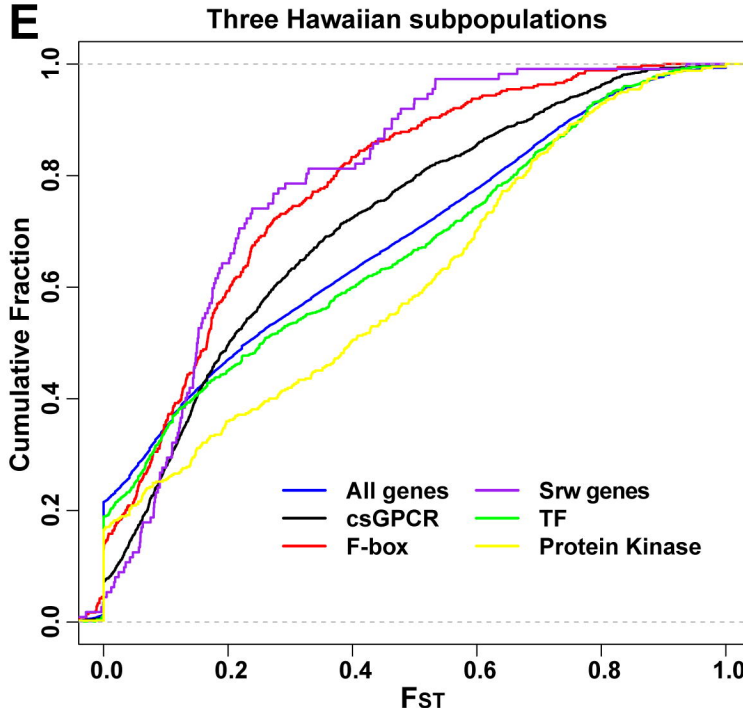

**F**

|                | non-Hawaiian Subpopulations | Hawaiian Subpopulations |
|----------------|-----------------------------|-------------------------|
| All genes      | 0.16                        | 0.31                    |
| F-box genes    | 0.26                        | 0.21                    |
| csGPCR         | 0.24                        | 0.28                    |
| Srw genes      | 0.28                        | 0.20                    |
| TF             | 0.16                        | 0.33                    |
| Protein Kinase | 0.16                        | 0.39                    |

**A**

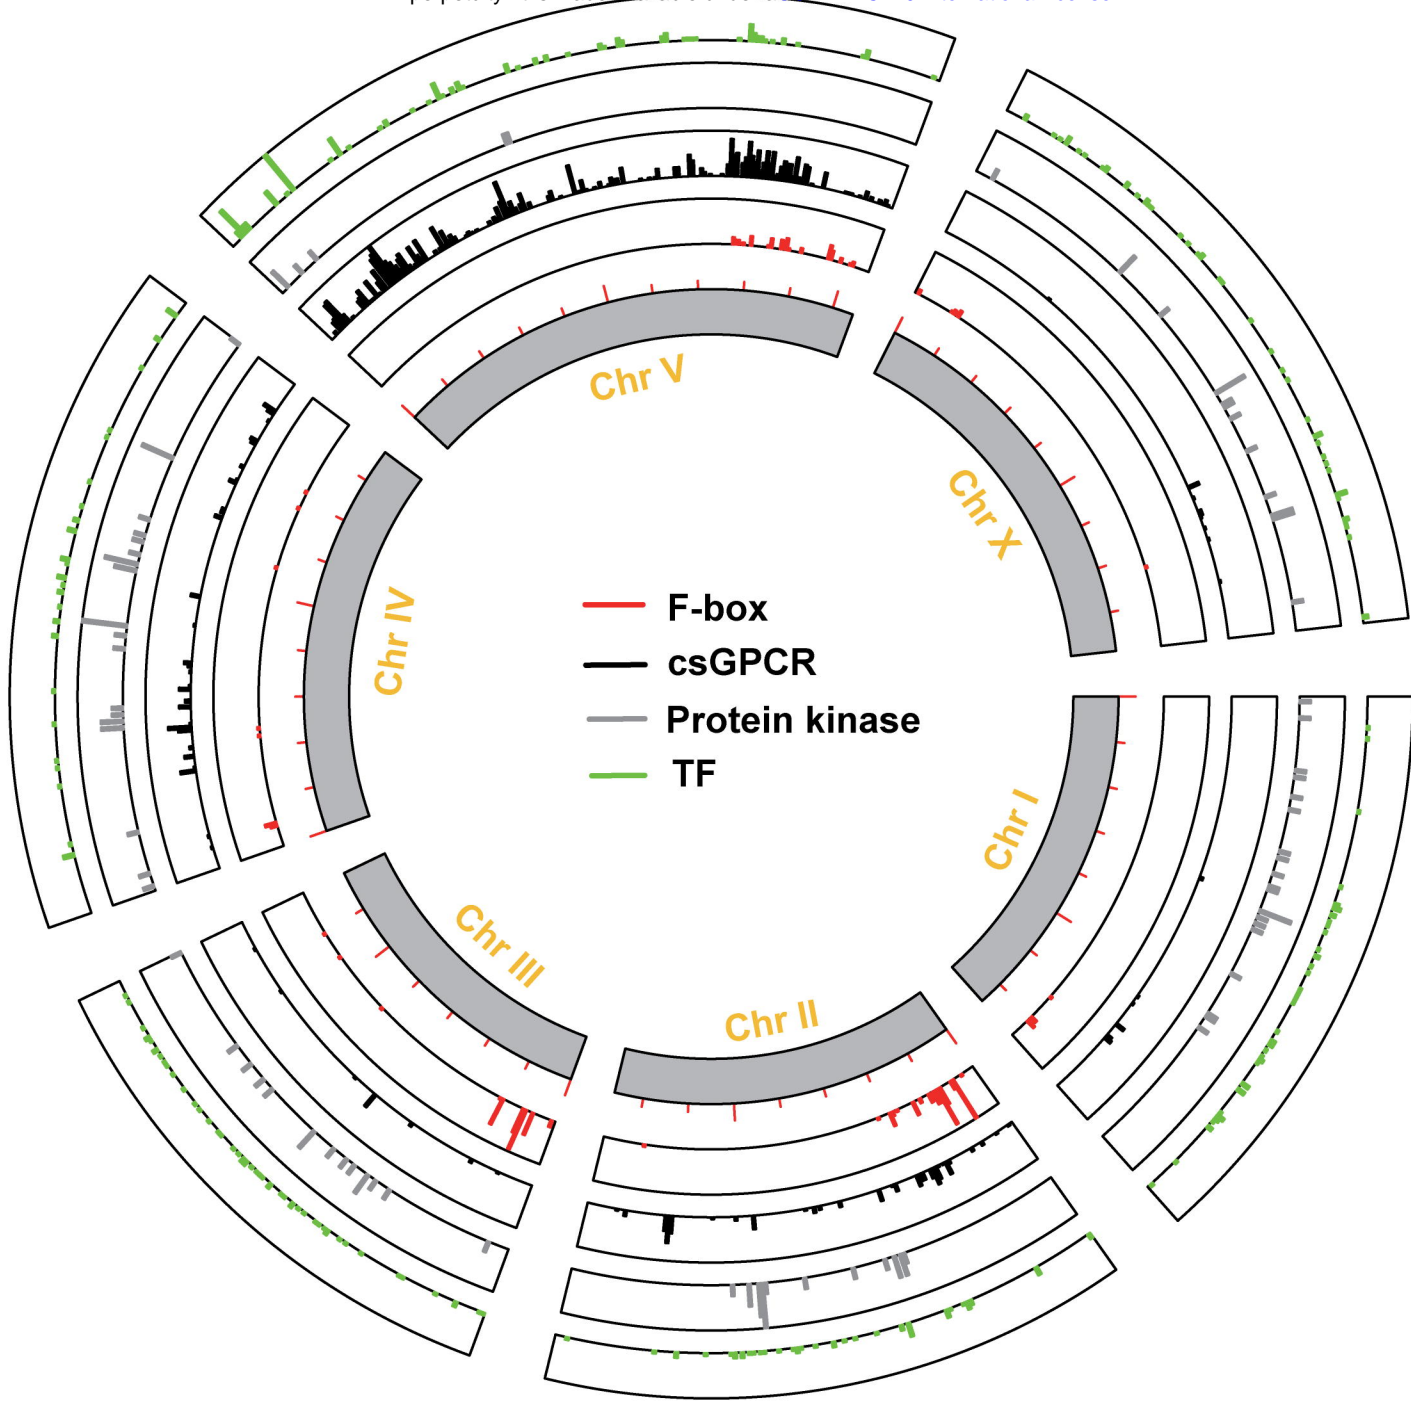

**B**

|             | <i>Pi</i>     |                |                |
|-------------|---------------|----------------|----------------|
|             | Left arm      | Center         | Right arm      |
|             | II: 0% ~ 25%  | II: 25% ~ 75%  | II: 75% ~ 100% |
| All genes   | 0.0034 (998)  | 0.0004 (1811)  | 0.0010 (687)   |
| csGPCR      | 0.0025 (70)   | 0.0006 (55)    | 0.0016 (46)    |
| F-box genes | 0.0058 (104)  | 0.0004 (8)     | 0.0028 (4)     |
|             | III: 0% ~ 25% | III: 25% ~ 75% | III: 75%~100%  |
| All genes   | 0.0024 (552)  | 0.0003 (1572)  | 0.0006 (547)   |
| F-box genes | 0.0056 (65)   | 0.0002 (6)     | 0.0023 (9)     |
|             | IV: 0% ~ 25%  | IV: 25% ~ 75%  | IV: 75%~100%   |
| All genes   | 0.0009 (731)  | 0.0003 (1957)  | 0.0010 (617)   |
| csGPCR      | 0.0012 (28)   | 0.0005 (85)    | 0.0009 (42)    |
|             | V: 0% ~ 25%   | V: 25% ~ 75%   | V: 75%~100%    |
| All genes   | 0.0017 (1216) | 0.0005 (2662)  | 0.0032 (1194)  |
| csGPCR      | 0.0021 (326)  | 0.0009 (320)   | 0.0034 (257)   |
| Srw genes   | 0.0025 (41)   | 0.0025 (21)    | 0.0055 (36)    |
| F-box genes | 0.0018 (6)    | 0.0011 (23)    | 0.0055 (63)    |

**C**

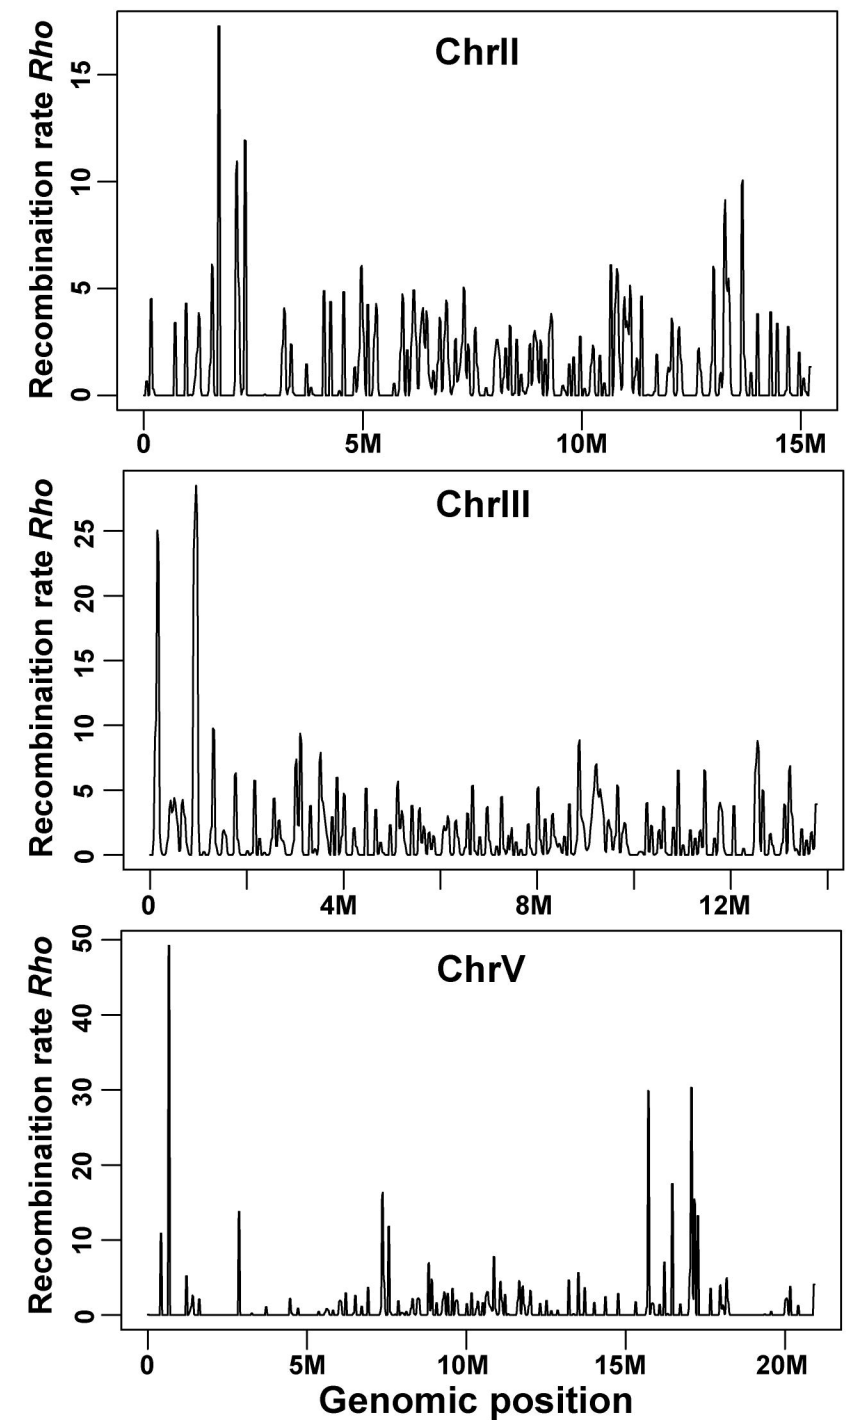

**D**

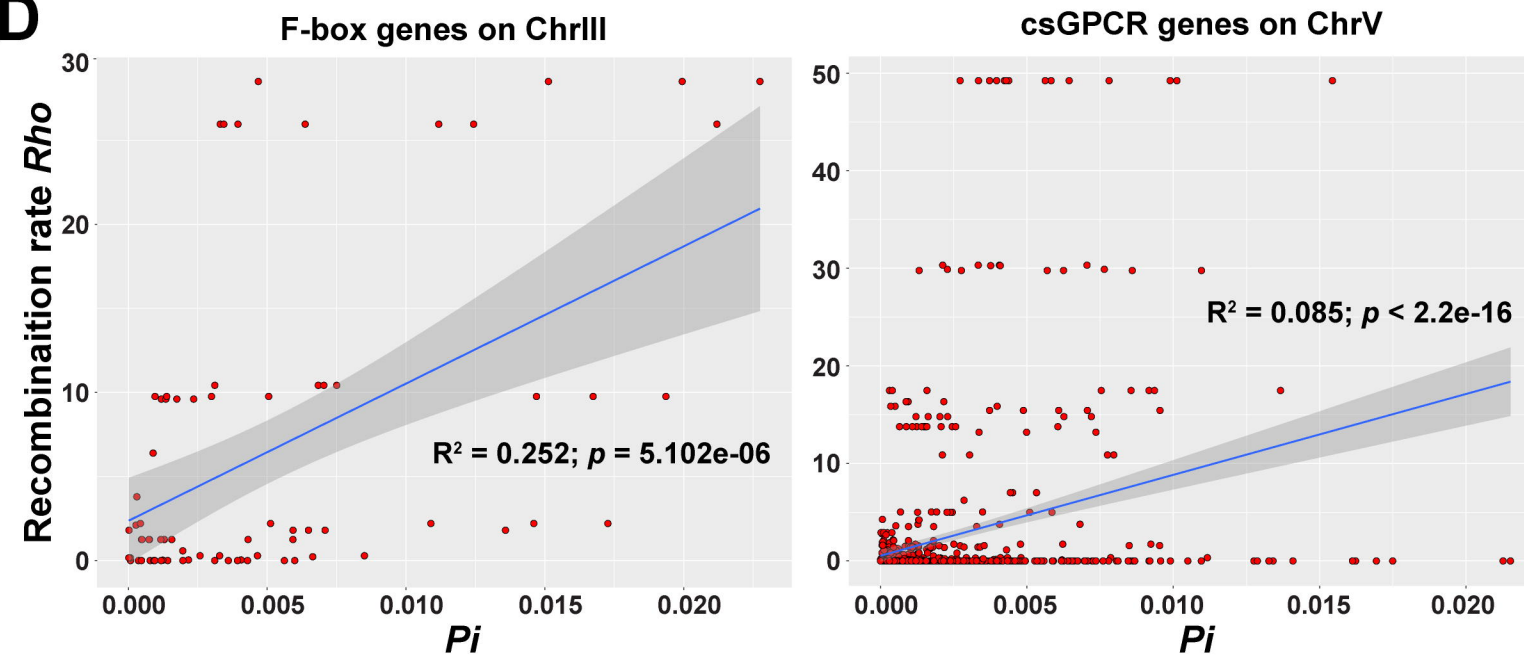

**A**

|             | Total number | Tajima's $D < -2$ |                 | Fay and Wu's $H < -20$ |                 | Overlap set |                 |
|-------------|--------------|-------------------|-----------------|------------------------|-----------------|-------------|-----------------|
|             |              | Number            | Enrichment fold | Number                 | Enrichment fold | Number      | Enrichment fold |
| csGPCRs     | 1301         | 192               | 2.82            | 260                    | 3.62            | 119         | 3.97            |
| F-box genes | 336          | 55                | 3.12            | 67                     | 3.61            | 18          | 2.33            |
| All genes   | 18797        | 985               |                 | 1038                   |                 | 432         |                 |

**B**

|                | Tajima's $D$ |        |
|----------------|--------------|--------|
|                | Mean         | Median |
| All genes      | -1.08        | -1.17  |
| csGPCRs        | -1.20        | -1.35  |
| F-box genes    | -1.08        | -1.28  |
| TF             | -1.07        | -1.17  |
| Protein kinase | -1.22        | -1.31  |

  

|                | Fay and Wu's $H$ |        |
|----------------|------------------|--------|
|                | Mean             | Median |
| All genes      | -4.17            | -1.38  |
| csGPCRs        | -9.76            | -3.15  |
| F-box genes    | -11.87           | -2.34  |
| TF             | -4.28            | -1.44  |
| Protein kinase | -2.81            | -1.62  |

Significance markers: \*\* (p < 0.01), \* (p < 0.05), ns (not significant), SU (Significant Uniqueness).

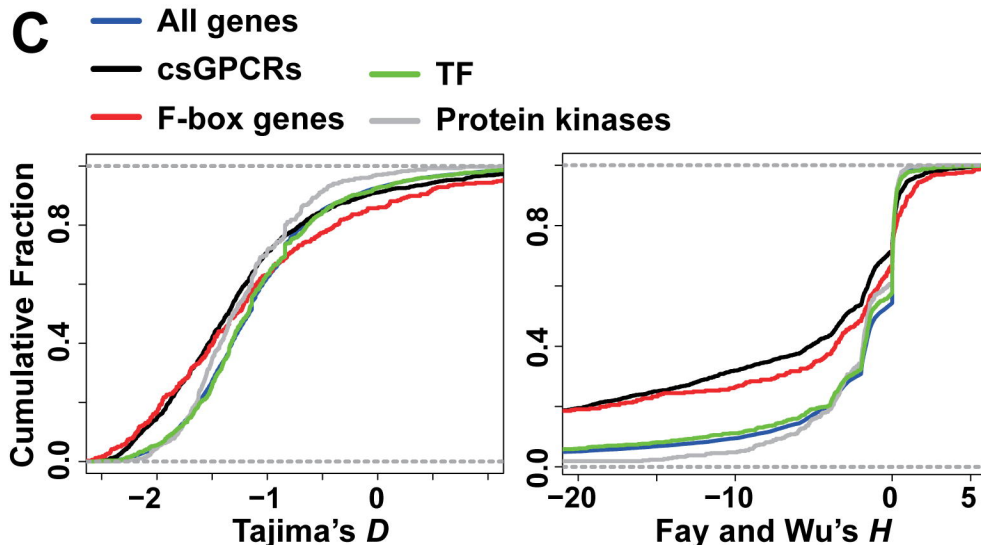

**D**

| csGPCR group     | Fay and Wu's $H$ |        |
|------------------|------------------|--------|
|                  | Mean             | Median |
| Solo (293)       | -14.10           | -4.69  |
| Str (567)        | -10.17           | -3.85  |
| Sra (126)        | -3.98            | -1.21  |
| Srg (315)        | -7.31            | -2.35  |
| Solo - Srw (112) | -22.46           | -19.06 |
| Solo - Srz (65)  | -6.84            | -1.19  |
| Solo - Srbc (69) | -14.14           | -9.79  |
| Solo - Srsx (37) | -3.04            | -1.09  |

Significance markers: \*\* (p < 0.01), \* (p < 0.05), ns (not significant), SU (Significant Uniqueness).

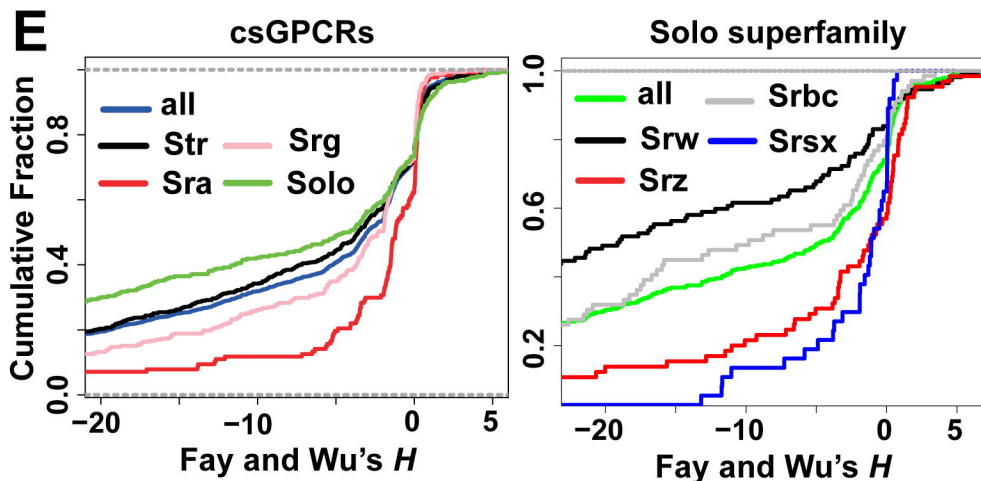



**A**

| Fay and Wu's $H$ (XZ1516 as outgroup) |             |              |          |          |          |          |
|---------------------------------------|-------------|--------------|----------|----------|----------|----------|
|                                       | All strains | Non-Hawaiian | Hawaiian | Hawaii_1 | Hawaii_2 | Hawaii_3 |
| All genes                             | -4.17       | -4.24        | -2.48    | -2.24    | -2.64    | -3.45    |
| csGPCRs                               | -9.76       | -10.19       | -7.13    | -6.09    | -6.47    | -8.57    |
| Srw GPCRs                             | -22.46      | -23.68       | -17.69   | -14.40   | -13.54   | -20.91   |
| F-box genes                           | -11.87      | -12.31       | -6.53    | -4.22    | -6.10    | -9.22    |
| TF                                    | -4.28       | -4.67        | -2.85    | -2.74    | -3.14    | -3.76    |
| Protein kinase                        | -2.81       | -3.03        | -1.43    | -1.56    | -1.83    | -2.45    |

**B**

|                | Number of high frequency derived sites with XZ1516 as the outgroup |                |                    |
|----------------|--------------------------------------------------------------------|----------------|--------------------|
|                | Among all strains                                                  | Among Hawaiian | Among non-Hawaiian |
| All gene       | 2.73                                                               | 2.58           | 2.76               |
| csGPCRs        | 6.24                                                               | 6.18           | 6.28               |
| Srw GPCRs      | 14.19                                                              | 13.62          | 14.22              |
| F-box          | 8.80                                                               | 8.07           | 8.87               |
| TF             | 2.97                                                               | 3.00           | 3.01               |
| Protein Kinase | 1.90                                                               | 1.63           | 1.93               |

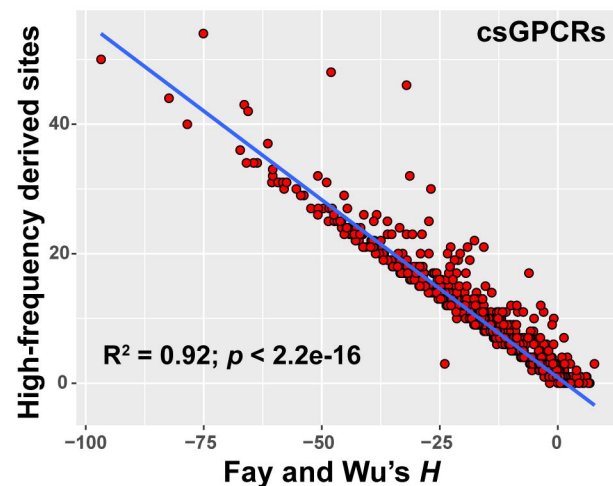**C**

| Fay and Wu's $H$ in non-Hawaiian Population |                    |                    |                   |                   |
|---------------------------------------------|--------------------|--------------------|-------------------|-------------------|
| Outgroup                                    | XZ1516 (ancestral) | ECA701 (ancestral) | ECA396 (Hawaii_1) | ECA742 (Hawaii_2) |
| All genes                                   | -4.24              | -4.03              | -2.42             | -2.90             |
| csGPCRs                                     | -10.19             | -11.01             | -4.09             | -5.61             |
| F-box genes                                 | -12.79             | -16.78             | -9.54             | -9.51             |

**D**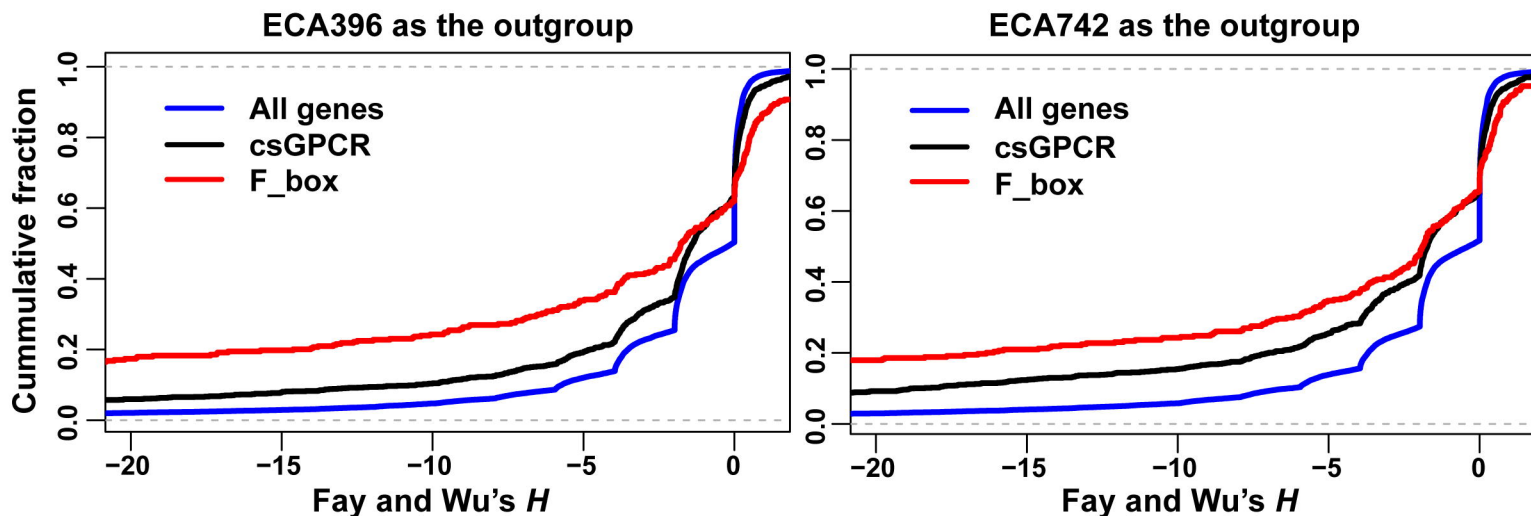

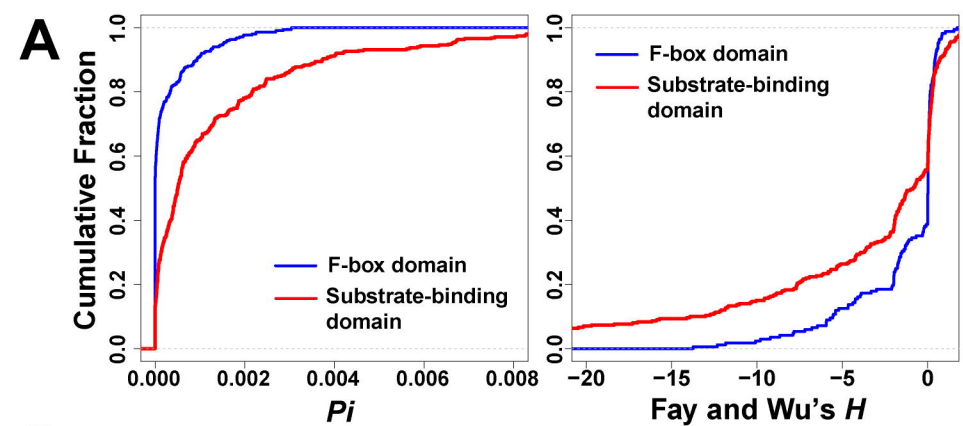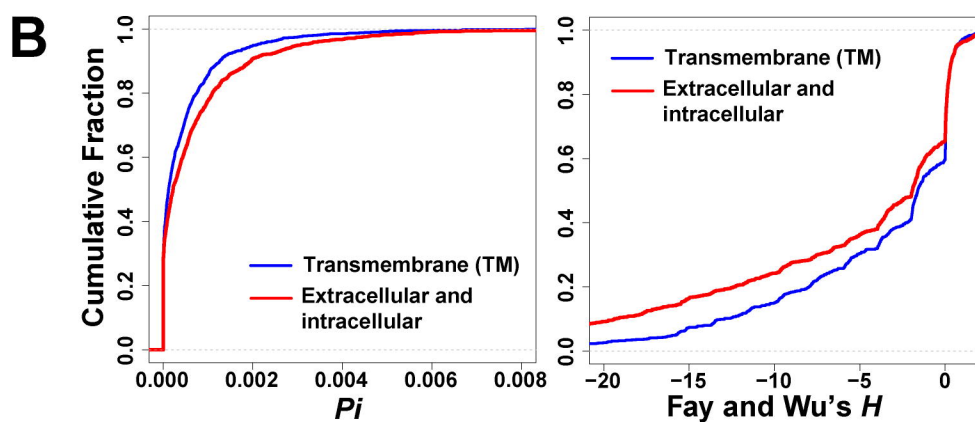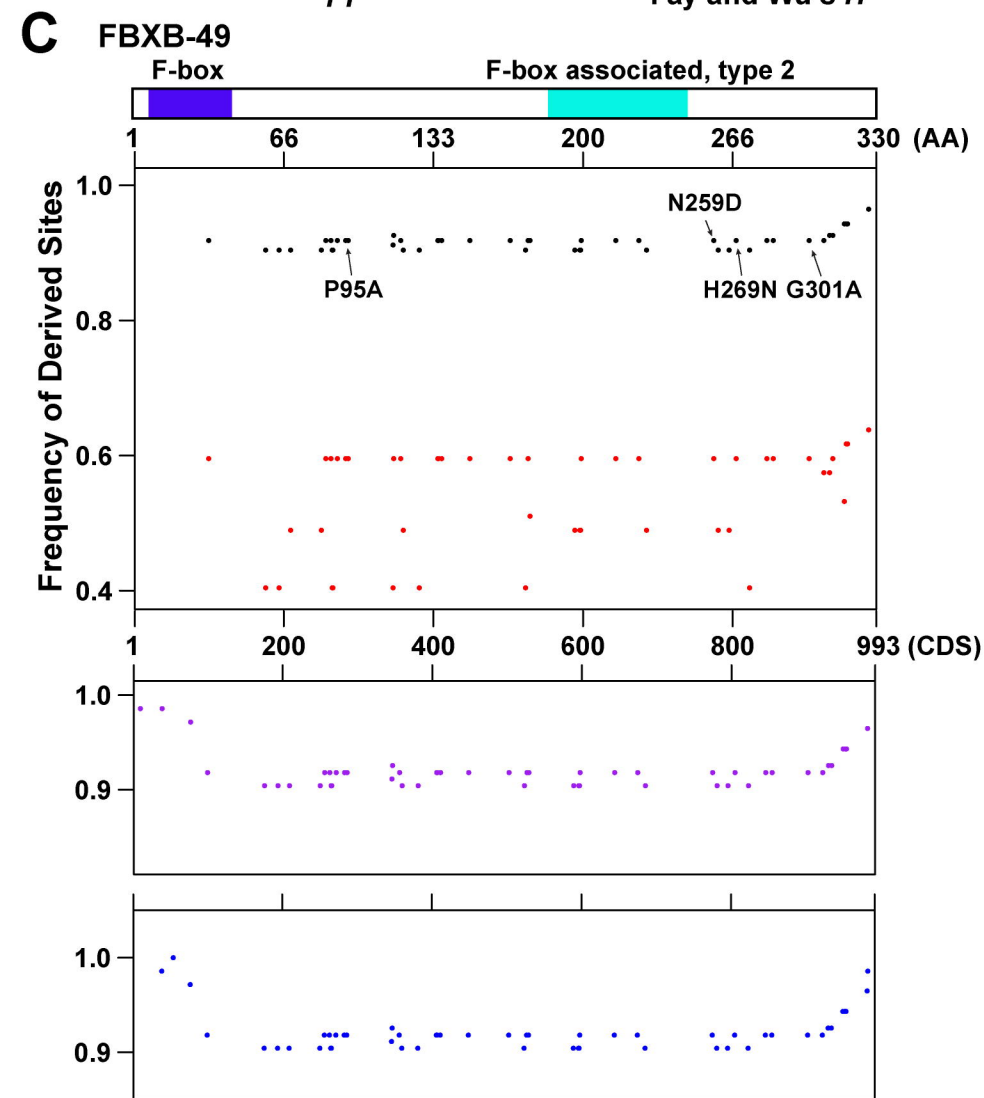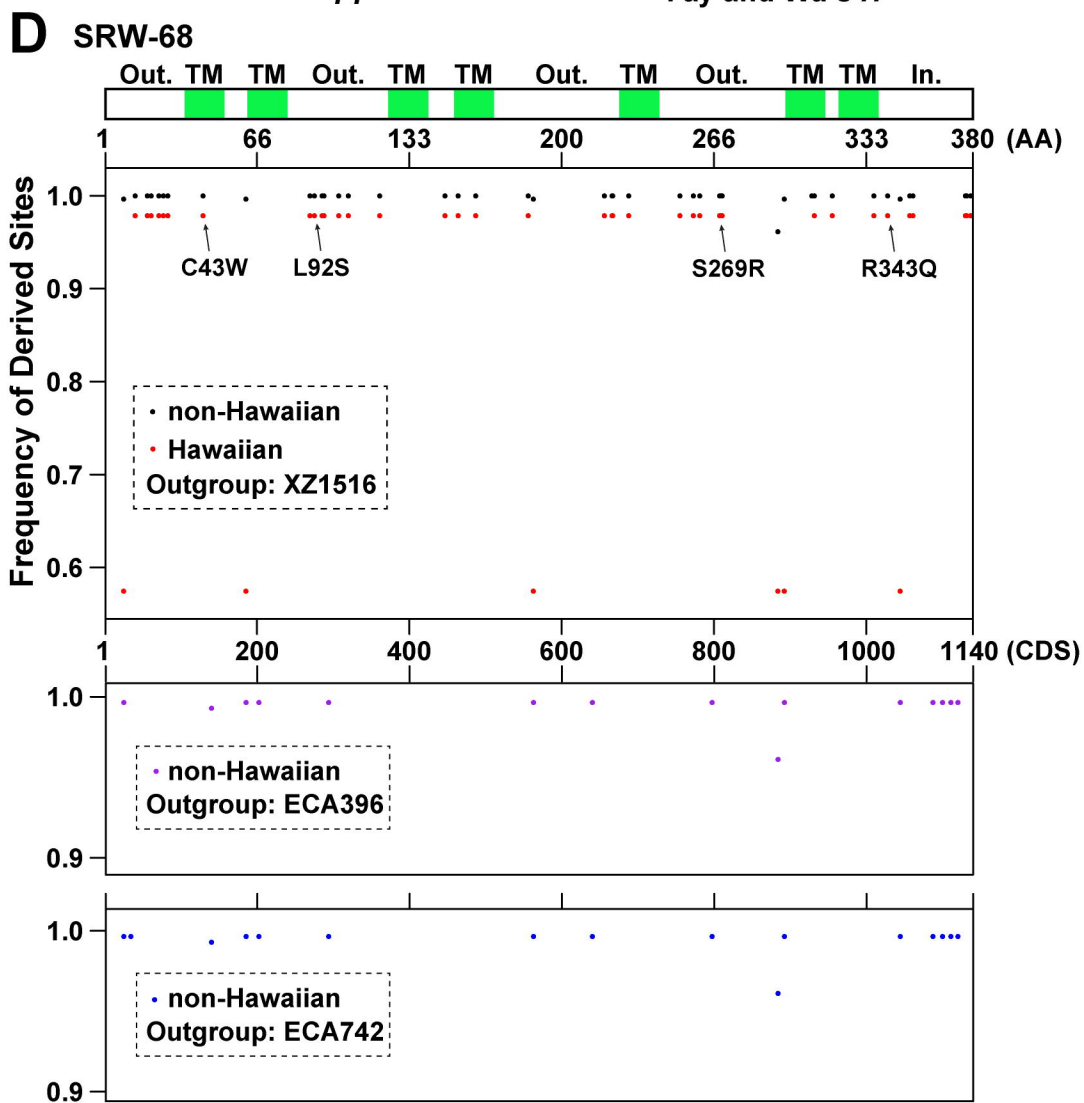

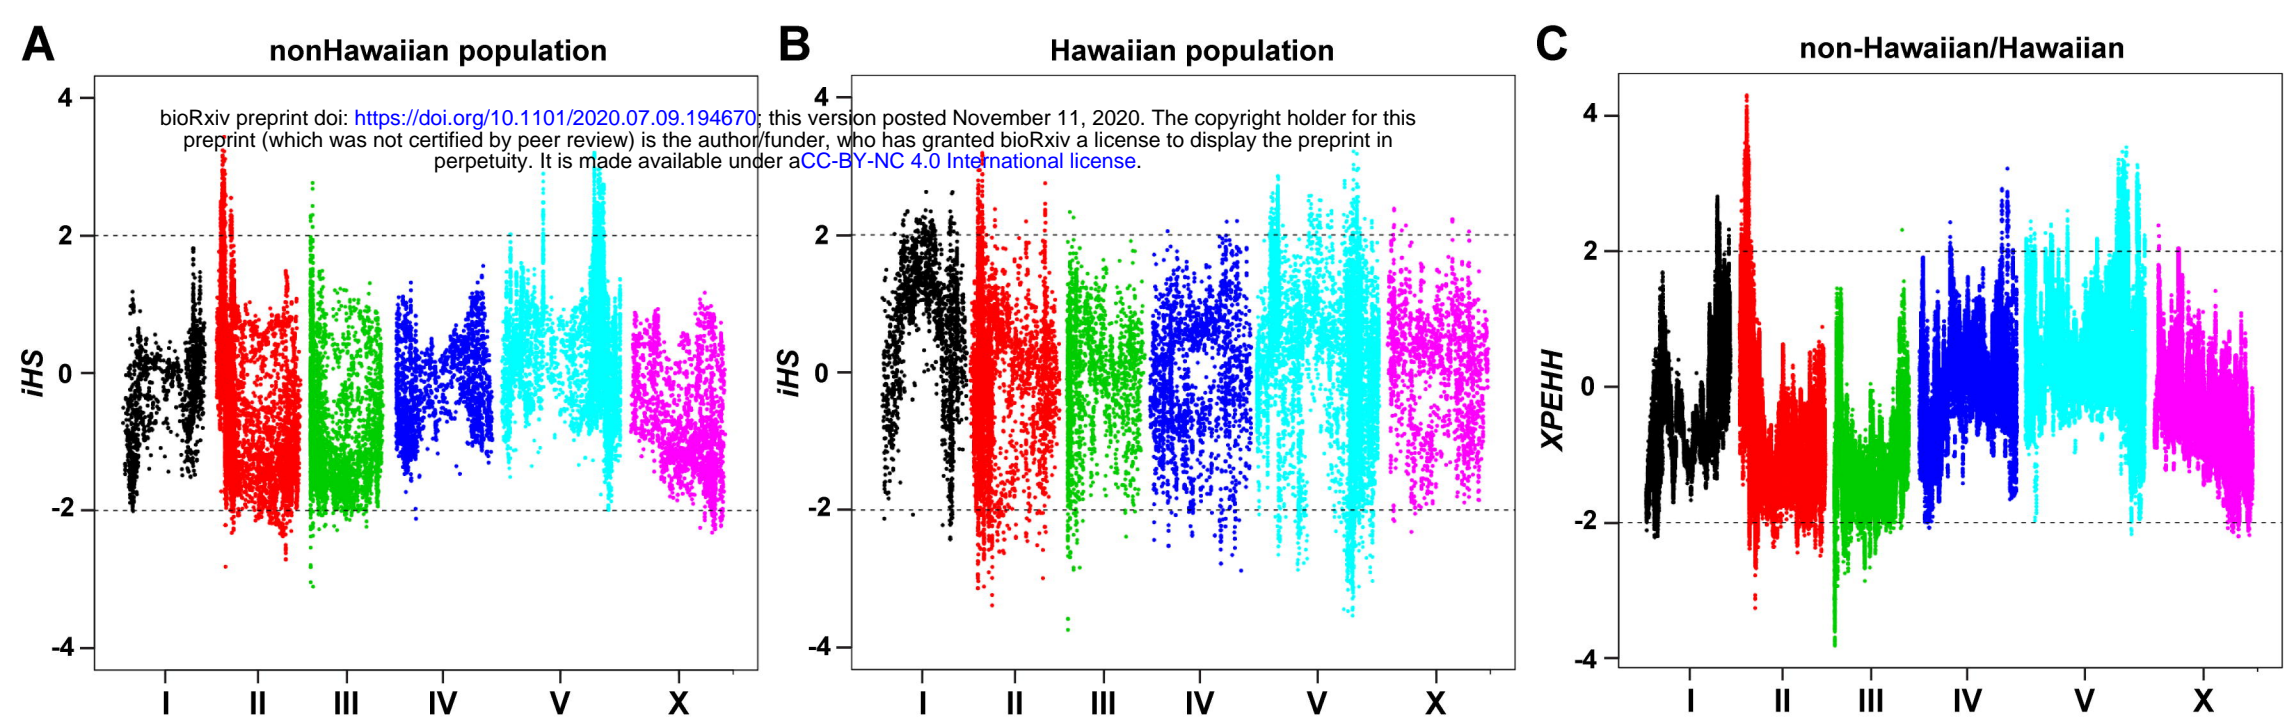

**D**

|                  | non-Hawaiian      | Hawaiian          | nonHawaiian/Hawaiian |
|------------------|-------------------|-------------------|----------------------|
|                  | $ iHS  > 2$       | $ iHS  > 2$       | XPEHH $> 2$          |
| # of genes       | 335               | 698               | 193                  |
| # of F-box genes | 27 (4.5 fold)     | 40 (3.2 fold)     | 31 (3.8 fold)        |
| # of csGPCRs     | 34 (1.5 fold)     | 126 (2.6 fold)    | 31 (2.3 fold)        |
|                  | Extended region   | Extended region   | Extended region      |
| # of genes       | 1277              | 3110              | 596                  |
| # of F-box genes | 83 (3.6 fold)     | 112 (2.0 fold)    | 82 (7.7 fold)        |
| # of csGPCRs     | 100 (1.1 fold)    | 485 (2.3 fold)    | 98 (2.4 fold)        |
|                  | $ iHS $ top 0.05% | $ iHS $ top 0.05% | XPEHH top 0.05%      |
| # of genes       | 11                | 42                | 26                   |
| # of F-box genes | 2 (10.1 fold)     | 6 (8.0 fold)      | 8 (17 fold)          |
| # of csGPCRs     | 4 (5.2 fold)      | 18 (6.2 fold)     | 3 (1.6 fold)         |

**E**

|           | Fay and Wu's $H$ (XZ1516 as outgroup) |                |                |
|-----------|---------------------------------------|----------------|----------------|
|           | Left arm                              | Center         | Right arm      |
|           | II: 0% ~ 25%                          | II: 25% ~ 75%  | II: 75% ~ 100% |
| All genes | -4.78                                 | -1.76          | -1.66          |
| F-box     | -11.1                                 | -1.99          | -6.58          |
|           | III: 0% ~ 25%                         | III: 25% ~ 75% | III: 75%~100%  |
| All genes | -3.32                                 | -1.35          | -2.34          |
| F-box     | -5.69                                 | -1.10          | -5.37          |
|           | V: 0% ~ 25%                           | V: 25% ~ 75%   | V: 75%~100%    |
| All genes | -12.33                                | -5.66          | -12.55         |
| csGPCRs   | -15.9                                 | -11.47         | -11.32         |
| Srw genes | -24.96                                | -38.58         | -14.2          |

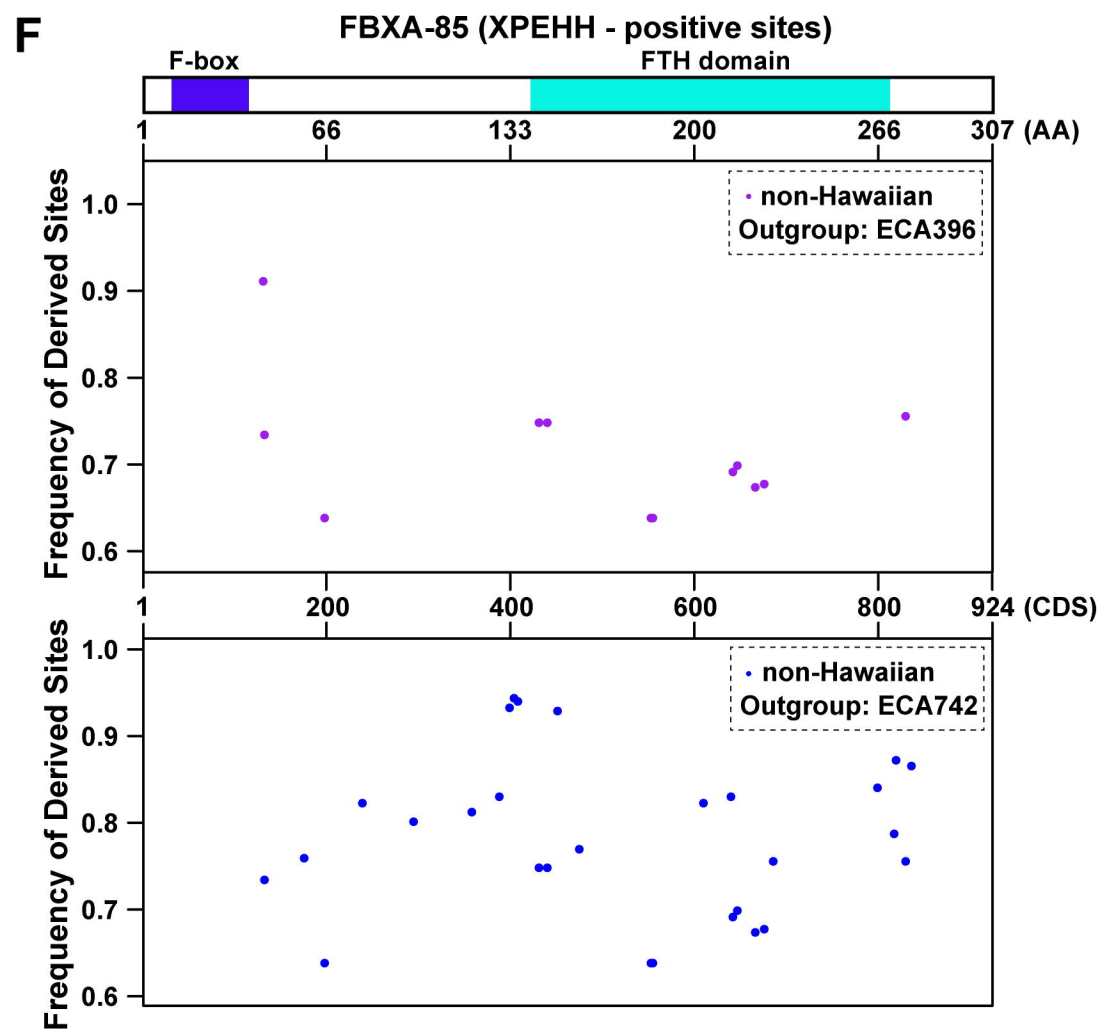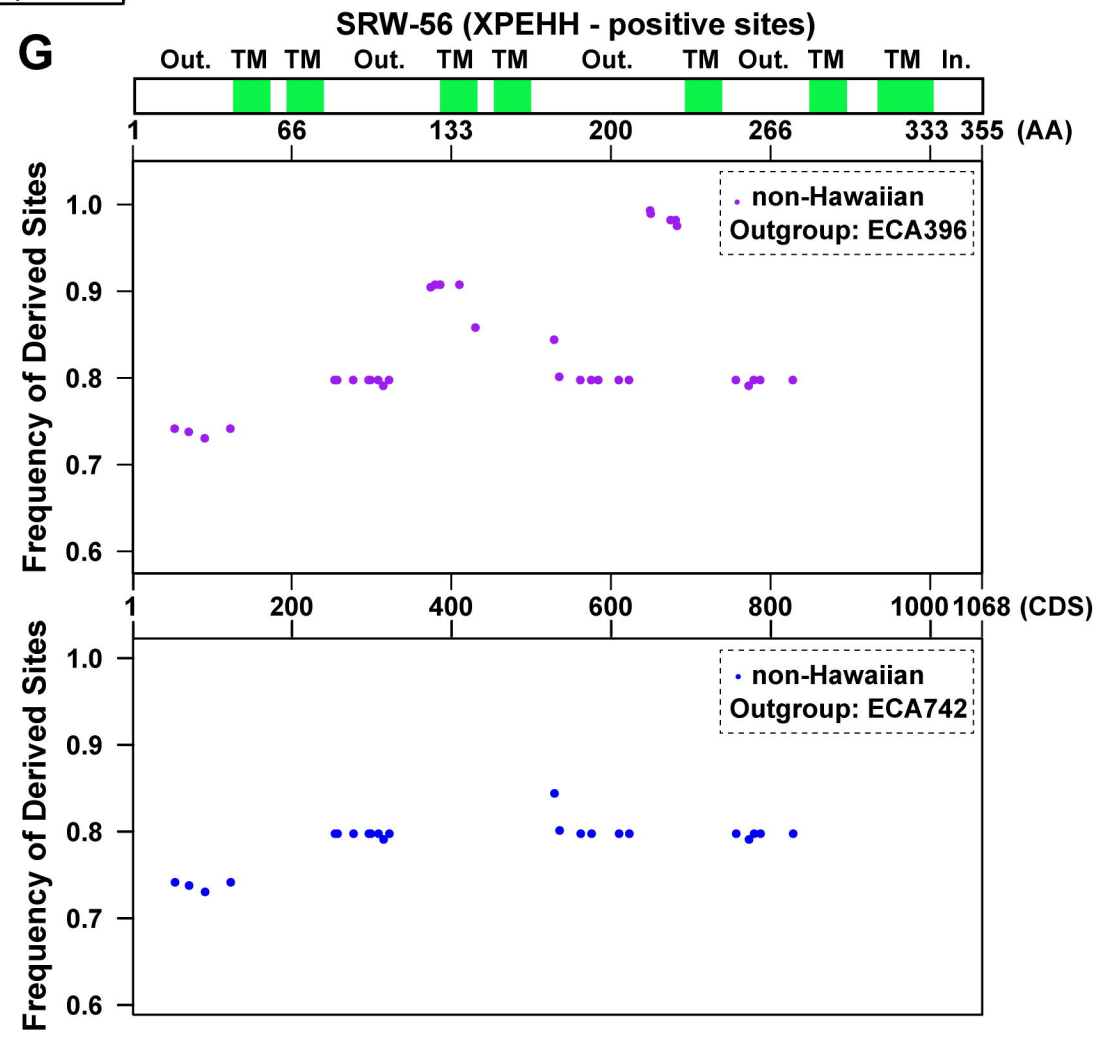

Source: https://www.biorxiv.org/content/10.1101/2020.07.09.194670v2.full.pdf
